35 **One Sentence Summary:**

36 Eight S protein-derived peptides, particularly S2-78 (aa 1148-1159), are of high  
37 performance for diagnosis of COVID-19 as well as discrimination of other coronaviruses.

38 **Abstract**

39 Serological test plays an essential role in monitoring and combating COVID-19  
40 pandemic. Recombinant spike protein (S protein), especially S1 protein is one of the  
41 major reagents for serological tests. However, the high cost in production of S protein,  
42 and the possible cross-reactivity with other human coronaviruses poses unneglectable  
43 challenges. Taking advantage of a peptide microarray of full spike protein coverage, we  
44 analyzed 2,434 sera from 858 COVID-19 patients, sera from 63 asymptomatic patients  
45 and 610 controls collected from multiple clinical centers. Based on the results of the  
46 peptide microarray, we identified several S protein derived 12-mer peptides that have  
47 high diagnosis performance. Particularly, for monitoring IgG response, one peptide (aa  
48 1148-1159 or S2-78) has a comparable sensitivity (95.5%, 95% CI 93.7-96.9%) and  
49 specificity (96.7%, 95% CI 94.8-98.0%) to that of S1 protein for detection of both  
50 COVID-19 patients and asymptomatic infections. Furthermore, the performance of S2-78  
51 IgG for diagnosis was successfully validated by ELISA with an independent sample  
52 cohort. By combining S2-78/ S1 with other peptides, a two-step strategy was proposed to  
53 ensure both the sensitivity and specificity of S protein based serological assay. The  
54 peptide/s identified in this study could be applied independently or in combination with  
55 S1 protein for accurate, affordable, and accessible COVID-19 diagnosis.

56

57 COVID-19 is caused by SARS-CoV-2[1,2] and is a global pandemic. By August 7, 2020,  
58 18,982,658 cases were diagnosed and 712,266 lives were claimed  
59 (<https://coronavirus.jhu.edu/map.html>)[3]. To put the pandemic under control, one of the  
60 essential options is to perform fast, reliable and affordable diagnosis. Although nucleic  
61 acid test (NAT) is the reference standard for diagnosing COVID-19 with high sensitivity  
62 and accuracy, however, false negative results were commonly observed[4,5]. The  
63 immunological/ serological test, for example, monitoring the SARS-CoV-2 specific IgG  
64 and IgM responses, provides important information to improve the accuracy of  
65 diagnosis[4,5]. In addition, serological test is suitable for population screening in high  
66 risk regions or among close-contact people, as well as surveillance of the pandemic  
67 spreading or assess the infection rate of general population[6–8]. Moreover, antibody  
68 response is reported to associated with disease severity or clinical outcomes[9,10].

69

70 S protein is the preferential antigen for serological assay. The key reagent of the S  
71 protein based serological assay is the recombinant protein. However, the production of  
72 the S protein is difficult and costly[11]. The inconsistency among different manufacturers  
73 or even batches might contribute to the variability of commercial assays with the same  
74 antigen[7,12]. Limited production capacity and high cost of recombinant protein  
75 preparation is the bottleneck, particularly for remote regions or poor countries. In  
76 addition, it should be concerned that the cross-reactivity of infections of other human  
77 coronaviruses may cause false positive results, especially for those four common cold  
78 causing coronaviruses, *i.e.*, HCoV-OC43, HKU1, NL63 and 229E, which are circulating  
79 in population[4,11,13]. It was reported that S1, compared with full length S protein,  
80 exhibit less cross-reactivity due to the less similarity of S1 subunit among the human  
81 coronaviruses than that of S2[4]. To develop highly specific serological test, more efforts  
82 are needed to identify sections of S protein that are highly immunogenic and less  
83 homologous to other related coronaviruses[6,11].

84

85 Spike protein derived peptides that can elicit antibodies in COVID-19 patients has  
86 been reported in several studies[14–16], including one of our previous work on epitope  
87 mapping with a small sample cohort[17]. For instance, antibody against S2-78 (aa

88 1148-1159) and S2-22 (aa 812-823) have high positive rates in COVID-19 patients.  
89 However, whether those peptides are suitable for diagnosis is still unknown. Herein, to  
90 fully evaluate the diagnostic value of the S protein derived peptides, a total of four  
91 cohorts of sera, consisted of 2,434 sera from 858 COVID-19 patients, sera from 63  
92 asymptomatic patients and 610 controls were used. Eight peptides were verified to have  
93 high potential for diagnosis, particularly, one peptide, S2-78 has a comparable diagnosis  
94 performance as that of S1 protein for COVID-19 patients and asymptomatic infections.  
95 By combining S2-78 IgG/ S1 IgG with other peptide/s, we purposed a two-step strategy  
96 that can ensure both sensitive and specific diagnosis for COVID-19.

97

## 98 **Results**

99

100 *Four independent cohorts of samples were collected and designed*

101 To fully evaluate the diagnostic potential of the spike derived peptides, sera from four  
102 cohorts of COVID-19 patients and controls from multiple medical centers of China were  
103 collected (**Table 1**). 1) Cohort 1 consists of 55 sera from convalescent COVID-19  
104 patients and 18 controls[17]; 2) Cohort 2 includes 2,360 sera from 784 in-hospital  
105 COVID-19 patients and 542 sera from a variety of controls. To accurately evaluate the  
106 peptides for diagnosis, for each patient, one serum sample that collected at least 21 days  
107 after onset of symptoms was selected according to the suggestion of WHO (World Health  
108 Organization) for antibody laboratory test[18]. As a result, in total, 729 sera were selected.  
109 The control groups include two types of samples. The first type is sera collected from  
110 hospitals, including sera from healthy people (n=92), upper respiratory infections (URI,  
111 n=104), patients with autoimmune diseases (AID, n=120), lung cancer patients (n=41)  
112 and patients with other diseases (n=112) that consist of cardiovascular or cerebrovascular  
113 diseases (34.2%), diabetes (9%), non-lung cancers (7.2%) and others. The second type is  
114 negative references provided by National Institutes for Food and Drug Control, including  
115 N11-N25 of National Reference Panel for 2019-nCoV (SARS-CoV-2) IgG Antibody  
116 Detection Kit (370096-202001) and other identified controls. 3) Cohort 3 includes 19  
117 COVID-19 patients from another hospital and 50 healthy controls. 4) Cohort 4 consists of  
118 asymptomatic patients defined as positive either on NAT (nucleic acid test) or antibody

119 test conducted by a commercial assay, and with a SARS-CoV-2 exposure history (see  
120 **methods**).

121

122 *Peptide S2-78 and several other peptides exhibit high diagnostic values*

123 To identify which section of S protein has diagnostic value, it is necessary to survey the  
124 entire protein on a systematic way. We took advantage of a previously constructed  
125 peptide microarray which has full coverage of S protein[17], analyzed 55 convalescent  
126 sera of COVID-19 patients along with 18 control sera (Cohort 1, **Table 1**). Overall,  
127 significant bindings of both IgG and IgM were observed in patient group, while the  
128 signals were low in the control group (**Fig. 1a**). Several peptides, *e. g.*, S2-78 and S1-93  
129 exhibit strong IgG antibody bindings and high response frequencies in patients, we define  
130 these peptides as “significant” peptides, these peptides may have diagnostic values (**Fig.**  
131 **1b**). To test whether the peptide specific IgG antibody responses are concentration  
132 dependent, 3x serially diluted peptides (0.9, 0.3 and 0.1 mg/mL) were printed and  
133 immobilized on the microarray. As expected, the averaged signals of the patient group,  
134 but not the control group, are proportional to the concentrations of the peptides (**Fig. 1c**).

135 To extensively evaluate the peptides for diagnostic application, a larger cohort (Cohort  
136 2, **Table 1**) of samples were screened by a revised peptide microarray that contains only  
137 one peptide concentration (0.3 mg/mL) for high-throughput analysis. To ensure the data  
138 generated from different microarrays are comparable, we prepared a positive reference  
139 sample by pooling 50 randomly selected patient sera. This reference sample was then  
140 tested on all the microarrays for normalization (see **methods**). Consistent results were  
141 achieved for most of the peptides. AUC (area under curve) values of IgG or IgM for each  
142 peptide were calculated. Eight peptides, *i. e.*, S2-78, S1-97, S1-93, S1-101, S1-111, S2-97,  
143 S1-105 and S2-22 are of high performance, the AUCs of IgG or IgM against these  
144 peptides for both Cohort 1 and 2 are above 0.85. Specifically, for Cohort 2 the AUC  
145 values with 95% CI (confidential intervals) for S2-78, S1-97, S1-93, S1-101, S1-111,  
146 S2-97, S1-105 and S2-22 were 0.99 (0.986-0.995), 0.954 (0.942-0.965), 0.934  
147 (0.92-0.948), 0.932 (0.917-0.947), 0.929 (0.915-0.943), 0.922 (0.907-0.938), 0.909  
148 (0.893-0.926), and 0.866 (0.846-0.886), respectively (**Fig. 2a**). For IgM, only S2-78 has a  
149 AUC >0.85, *i. e.*, 0.953 (0.941-0.964) (**Fig. 2a**). As expected, IgG and IgM for both N

150 protein and S1 protein exhibited high performance. We further examined the antibody  
151 responses in different groups for each peptide (**Fig. 2b-e, Fig. S1**). Consistently, signals  
152 for COVID-19 group are significantly higher than that of the negative samples in all  
153 groups. It is noted that the signal intensity for S1 IgG is generally higher than that of any  
154 single peptide in the group of COVID-19 patients, this may because there are multiple  
155 antibody binding sites on S1 protein. However, slightly higher signal is also observed in  
156 control group for protein antigens, demonstrating non-specific binding while it is largely  
157 eliminated for synthetic peptides. It is suggested that more sensitive detection platforms  
158 or higher antigen concentration might improve the performance of peptides for diagnosis.

159

160 *The diagnostic performance of S2-78 IgG is comparable to that of S1 IgG for COVID-19*  
161 *patients*

162 We next focused on S2-78, the peptide of best performance for detection. Optimal  
163 Youden index of ROC (receiver operating characteristic) curve was used to set the cutoff  
164 value. The specificity, sensitivity and overall accuracy (95% CI) of S2-78 IgG for  
165 detection of COVID-19 are 96.7 (94.8-98.0%), 95.5% (93.7-96.9%) and 96% (94.8-97%),  
166 respectively, which are slightly lower than that of S1 IgG (**Table 2**). Since serological  
167 test is essential for population screening, we calculated the PPV (positive predict value)  
168 and NPV (negative predict value) of two assumed prevalence rates. One is 0.04 for  
169 general population originated from the situations of Wuhan, China[19] and  
170 Netherlands[20]. The other is 0.5 for a high risk population[7]. For prevalence rate of 0.5,  
171 both PPV and NPV of S2-78 IgG is similar to that of S1 IgG, however, for prevalence  
172 rate of 0.04, the PPV is only 54.7%, although the NPV is extremely high, suggesting the  
173 antibody detection of S2-78 could effectively exclude negative ones but may generate  
174 high false positive rate at low rate. However, for low prevalence rate, since the number of  
175 real positive are very low, it might be acceptable to perform additional test by using other  
176 antigens to improve the overall performance.

177

178 We next investigated the consistency between S1 IgG and S2-78 IgG (**Fig. 3a, b**). The  
179 overall consistencies for COVID-19 group and Control group are 96.3% and 96.7%,  
180 respectively. Interestingly, there are eight samples from COVID-19 patients are negative

181 for S1 IgG but positive for S2-78 IgG, suggesting it will be of diagnostic value to  
182 combine S2-78 and S1. It is known that the immune response may correlate to some key  
183 clinical parameters, such as gender, disease severity, age and the final outcome[5,9]. To  
184 test whether the positive rate of S2-78 IgG is associated with these clinical parameters,  
185 we analyzed the detection sensitivities among subgroups, *i. e.*, male vs. female,  $\geq 60$  vs.  
186  $< 60$  for age, severe vs. non-severe cases and survivor vs. non-survivor with critical  
187 diseases. Similar to that of S1 IgG (**Fig. S2a**), no significant difference was observed in  
188 all these subgroups.

189

190 Virus specific antibodies would persistently increase and usually conduct  
191 seroconversion within one or two weeks after symptom onset, and the portion of patients  
192 with positive antibodies reach  $\sim 100\%$  after two or three weeks[21,22]. To test whether  
193 S2-78 IgG is suitable to detect the dynamic change of antibody response, we analyzed the  
194 positive rates at different time points after the onset of symptoms. Expectedly, the  
195 positive rate of S2-78 IgG continuously increased and reach the plateau about three  
196 weeks after onset, which is similar as S1 and N IgG (**Fig. 3d**). Similar trends were  
197 observed for S2-78 IgM (**Fig. 3e**) and IgG antibodies against other peptides (**Fig. S2b**).  
198 These observations suggest that the antibodies against S2-78 and other peptides could be  
199 applied for monitoring virus specific antibody dynamics.

200

201 *The diagnostic performance of S2-78 IgG is comparable to that of S1 IgG for*  
202 *asymptomatic infections*

203 Monitoring of asymptomatic infections is essential to put SARS-CoV-2 infection under  
204 control. It is thought that asymptomatic infection usually has a weak immune  
205 response[23]. To test whether S2-78 IgG could be used for detection of asymptomatic  
206 infection, we analyzed 63 asymptomatic patients (Cohort 4, **Table 1**) defined as positive  
207 either in NAT test or antibody test conducted by a commercial assay (see **methods**) but  
208 without obvious symptom. Four subgroups were divided according to positive or not for  
209 NAT, IgG or IgM[24]. It was shown that for S1 IgG and S2-78 IgG, all samples ( $n=4$ ) of  
210  $\text{IgG}^-$  group were negative, while of the 59  $\text{IgG}^+$  asymptomatic infections, 47 and 45 were  
211 positive for S1 IgG and S2-78 IgG, respectively. (**Fig 4a, b**). The consistency between S1



212 IgG and S2-78 IgG was also high (93.7%). The contradictory results in IgG<sup>+</sup> group  
213 between our data and the commercial assay may due to the differences of antigens  
214 involved. S and N recombinant proteins are used for the commercial assay, for which  
215 slightly lower specificity is common[7]. Overall, these results demonstrate the diagnostic  
216 and screening value of S2-78 IgG for asymptomatic infections.

217

218 *The diagnostic value of S2-78 IgG was validated by ELISA*

219 ELISA (enzyme linked immunosorbent assay) is common for commercial SARS-CoV-2  
220 antibody assays[8,25]. To verify the efficacy and applicability of S2-78 IgG, we  
221 established an ELISA assay. Firstly, to test the consistency of the peptide microarray and  
222 ELISA, we randomly selected 31 sera from COVID-19 patients of Cohort 1 and tested by  
223 ELISA. High consistency was achieved with a Pearson correlation of 0.926 (**Fig. 5a**),  
224 demonstrating the validity of the microarray results. To further validate the performance  
225 of S2-78 IgG, we screened another independent cohort of samples collected from a  
226 different medical center (Cohort 3, **Table 1**). As expected, high performance of S2-78  
227 IgG for specific detection of COVID-19 was achieved by ELISA (**Fig. 5b, c**).

228

229 *A two-step strategy by combining S2-78 and other peptides for specific detection of*  
230 *SARS-CoV-2 infections*

231

232 Because of the highly homologous genomes among human coronaviruses, one  
233 unneglectable risk for antibody based diagnosis of SARS-CoV-2 infection is the possible  
234 cross-reactivity with other coronaviruses, especially for those common cold causing  
235 coronaviruses, *i. e.*, HCoV-OC43, HKU1, NL63 and 229E. The protein sequences of S  
236 protein among those viruses are of high similarity, selection of sections of S protein that  
237 are unique for SARS-CoV-2 is important for diagnosis[11,13]. To investigate whether the  
238 identified peptides are specific to SARS-CoV-2, we performed homology analysis among  
239 SARS-CoV-2 and 6 other coronaviruses (**Extended data Fig 3**). High homologies were  
240 observed for S2-78 and S2-22, suggesting they alone may not suitable for specific  
241 detection of SARS-Cov-2 infection. In contrast, other peptides, *i. e.*, S1-93,  
242 97,101,105,111 and S2-97, exhibit low similarities with other coronaviruses, particularly  
243 the four coronaviruses that cause common cold in human, suggesting they could be



244 applied for specifically detection of SARS-Cov-2 infection. S1-97 with the best  
245 performance among these peptides was selected for further investigation. Considering the  
246 relatively low sensitivity (86.2%) of S1-97 IgG (**Fig. 2, Fig. S4**), we proposed a two-step  
247 strategy by combining S1-97 IgG and S2-78 IgG for detection (**Fig. 6a**). To simplify this  
248 strategy, there are three assumptions: 1) S2-78 IgG can detect the infection of  
249 SARS-CoV-2 and related coronaviruses with the same sensitivity (95.5%) and generates  
250 a false positive rate of 3.3% (1-specificity, 1- 96.7%) for healthy and patients of other  
251 diseases; 2) S1-97 IgG can specially detect SARS-CoV-2 infection with 86.2% sensitivity  
252 and no cross-reactivity with related coronaviruses, so it would generate a false positive  
253 rate of 6.8% (1-specificity, 1-93.2%) for the infection of related coronaviruses, healthy  
254 control and patients with other diseases; 3) The positive rate of S2-78 IgG and S1-97 IgG  
255 in each group is independent to each other. According to the two-step strategy (**Fig. 6a**),  
256 for any given sample, the first step is to detect S2-78 IgG; For the positive ones, the  
257 second step is to detect S1-97 IgG. The samples positive for both S2-78 and S1-97 are  
258 defined as final positive, while the samples negative for either one is defined as negative.  
259 As a result, the sensitivity for SARS-CoV-2 infection detection would be 82.3%, the  
260 specificity for related coronavirus infections would be 93.5% (*specificity 1*), and the  
261 specificity for control group would be 99.8% (*specificity 2*). To further improve the  
262 performance of the two-step strategy, a panel (Panel-A) of peptides was composed by  
263 bivariate regression analysis based on the specificity of each peptide to SARS-CoV-2.  
264 The linear function for Panel-A is  $y = 0.014 * x_1 + 0.02 * x_2 - 0.003 * x_3 + 0.006 * x_4 - 2.593$ ,  
265 where  $y$  represents signals of Panel-A and  $x_1, x_2, x_3, x_4$  represents the signals of IgG  
266 against S1-93, 97, 101 and 105, respectively. The sensitivity and specificity of Panel A,  
267 based on the data generated from Cohort 2, is 88.3% and 96.7%, respectively (**Fig. 6b, c**).  
268 Follow the two-way strategy by combining S2-78 IgG and Panel-A, the final sensitivity  
269 for the detection of SARS-CoV-2 infection, specificity for related coronavirus infection  
270 (*specificity 1*), and the specificity for control group (*specificity 2*) are 84.3%, 96.8% and  
271 99.9%, respectively (**Fig. 6d**). When S1 protein and Panel-A are combined, the final  
272 sensitivity for the detection of SARS-CoV-2 infection, specificity for related coronavirus  
273 infection (*specificity 1*), and the specificity for control group (*specificity 2*) are 85.3%,  
274 96.8% and 99.99%, respectively (**Fig. S4b**). These results demonstrate that combination

275 of human coronavirus conserved peptides or S1 protein and other SARS-CoV-2 specific  
276 peptides (“significant” peptides) enable specific detection of SARS-CoV-2 infection with  
277 a high specificity and acceptable sensitivity.

278

## 279 **Discussion**

280 In this study, we took advantage of a peptide microarray of full S protein coverage  
281 [17,26], analyzed 2,434 sera from 858 COVID-19 patients, sera from 63 asymptomatic  
282 patients and 610 controls collected from multiple medical centers. We identified eight  
283 12-mer peptides (“significant” peptides) which exhibit high diagnostic values as antigens  
284 to detect SARS-CoV-2 specific IgG or IgM. Among the “significant” peptides, S2-78  
285 IgG has a comparable diagnosis performance to that of S1 protein for the detection of  
286 COVID-19 and asymptomatic infections, suggesting S2-78 has the potential for  
287 serological prevalence investigation. By combining S2-78 and other “significant”  
288 peptides of low homologous among common human coronaviruses, we purposed a  
289 two-step strategy for accurate and affordable detection of SARS-CoV-2 infection.

290

291 Serological test plays an important role in diagnosis and monitoring of COVID-19.  
292 Recombinant proteins, particular S1, is one of the key reagents to build immunoassay for  
293 detecting SARS-CoV-2 IgG, IgM or IgA. However, expressing S1 protein in the right  
294 conformation is usually difficult, and in some cases, the antibodies that recognize  
295 membrane spike protein are unable to bind recombinant S protein[27]. Moreover, the  
296 inconsistency of the proteins from different manufacturers and even different batches  
297 from the same manufacturer may result in high variation. High cost and insufficient  
298 capacity to produce enough amount of high quality recombinant S1 protein limits the  
299 accessibility of the immunoassay in poor or remote regions around the world.  
300 Alternatively, peptide-based immunoassay provides a superior choice to S1 protein  
301 assays. The reasons are as follows: 1) The peptide synthesis could be easily scaled up  
302 when required. A large amount of peptide could be easily synthesized within a very short  
303 period of time, if necessary, the peptide could be synthesized in a GMP facility; 2) The  
304 consistency and purity of peptide synthesis is high, there is almost no batch-to-batch

305 variation; 3) Peptide is very stable, as reagent, it could be easily stored and transported; 4)  
306 The cost of peptide is about 2-3 magnitude lower than that of S1 protein.

307

308 We identified S2-78 as a candidate of high diagnostic value. Applying large cohorts of  
309 COVID-19 patients and a variety types of controls, we comprehensively verified S2-78  
310 IgG as a good candidate for diagnosis of COVID-19, with comparable specificity and  
311 sensitivity to that of S1 IgG. Expectedly, we found that the overall consistency of S2-78  
312 IgG and S1 IgG is high, suggesting S2-78 has the potential to replace S1 protein. It is  
313 notable that, the signal intensity level of S2-78 IgG is lower than that of S1 IgG, which is  
314 reasonable since there are multiple sites on S1 protein that could be recognized by  
315 antibodies in COVID-19 sera. However, because it is hard to ensure extremely high  
316 purity when purifying recombinant proteins, the background of S1 IgG for control group  
317 is also higher than that of peptides. These results imply the sensitivity of S2-78 IgG might  
318 be further evaluated when raise the antigen concentration or adopt a more sensitive  
319 platform for detection, such as electrochemical platform or single-molecule detection  
320 technologies[28,29]. Indeed, we also performed S1 based ELISA assay by a commercial  
321 kit with the same set of samples, the overall performance of S2-78 IgG based ELISA is  
322 comparable to that of the commercial kits (data not shown).

323

324 Immunoassay is the major tool to assess the extent of virus circulation in population  
325 and the likelihood of protection against re-infection by screening population to identify  
326 infected individuals without clinical symptoms[7,12,19]. We verified that S2-78 IgG  
327 could be applied to detect asymptomatic infections with a comparable sensitivity and  
328 specificity with S1 IgG, though these individuals are thought to have weaker immune  
329 responses[23]. We assessed PPV and NPV for two prevalence rates, *i. e.*, 0.04 and 0.5.  
330 For 0.04, the PPV is 54.7% and NPV is 99.8%, indicating a high false positive rate, while  
331 it can effectively and accurately exclude the negative ones. Due to the small number of  
332 positive cases under this circumstance, one possible solution is to re-test the suspected  
333 samples by additional assays. Moreover, to meet the requirement of population-wide  
334 application, the performance of S2-78 might be improved by optimizing the parameters  
335 or adoption of other platforms.

336

337 S protein shares high sequence similarities with other seasonal circulated human  
338 coronaviruses. Theoretically, cross-reactivity may exist when S/S1 is applied as antigen  
339 for immunological test, thus cause false positive. It is thus necessary to pinpoint specific  
340 regions/ sites of SARS-CoV-2 S protein and eliminate the potential cross-reactivity.  
341 Selection of peptides with high antibody responses and low sequence similarities with  
342 other coronaviruses will improve the performance of diagnosis. Among the identified  
343 peptides, except S2-78 and S2-22, other peptides are very distinct to the four circulating  
344 human coronaviruses, implying that they could be served as the specific antigen to  
345 eliminate the potential cross-activity. However, these peptides exhibit slightly lower  
346 sensitivity and specificity. To take advantage of these “significant” peptides, we proposed  
347 a two-step strategy that combine S2-78 with other significant peptide/s to discriminate  
348 SARS-CoV-2 from related infections as well as non-infections. This study could be  
349 further strengthened by testing sera collected from the infections of common human  
350 coronaviruses, *i. e.*, HCoV-OC43, HKU1, NL63 and 229E.

351

352 In summary, we identified and verified eight peptides derived from S protein that  
353 exhibit high diagnostic values. These peptides might be used in different circumstances  
354 alone or in combination as candidates to build immunoassay/s for monitoring COVID-19.  
355 In comparison to the current protein based immunoassays, the peptide based assays will  
356 be highly affordable and accessible.

357

## 358 **Materials and Methods**

### 359 *Patients and samples*

360 The study was approved by the Ethical Committee of Tongji Hospital, Tongji Medical  
361 College, Huazhong University of Science and Technology, Wuhan, China  
362 (ITJ-C20200128), Institutional Ethics Review Committee of Foshan Fourth Hospital,  
363 Foshan, China (202005) and the Ethical Committee of The Fifth Affiliated Hospital of  
364 Sun Yat-sen University, Zhuhai, China (K14-2). Written informed consent was obtained  
365 from all participants enrolled in this study. COVID-19 patients were hospitalized and

366 received treatment in multiple medical center during the period from 25 January 2020  
367 and 28 April 2020. Sera of the control group from healthy donors, lung cancer patients,  
368 patients with autoimmune diseases were collected from Ruijin Hospital, Shanghai, China  
369 or Tongren Hospital, Shanghai, China. The negative reference samples were from  
370 National Institutes for Food and Drug Control. Sera of 63 asymptomatic patients were  
371 also from Tongji Hospital, Wuhan. The IgM and IgG antibodies against recombinant  
372 nucleoprotein and spike protein of SARS-CoV-2 in sera of these patients were detected  
373 by a commercial kit (YHLO Biotech, Shenzhen, China). According to the instruction of  
374 the kit, the antibody level  $\geq 10$  AU/ mL is positive, and  $< 10$  AU/mL is negative. All the  
375 samples were stored at  $-80^{\circ}\text{C}$  until use.

376

### 377 *Peptide synthesis and conjugation with BSA*

378 The N-terminal amidated peptides were synthesized by GL Biochem, Ltd. (Shanghai,  
379 China). Each peptide was individually conjugated with BSA using Sulfo-SMCC (Thermo  
380 Fisher Scientific, MA, USA) according to the manufacture's instruction. Briefly, BSA  
381 was activated by Sulfo-SMCC in a molar ratio of 1: 30, followed by dialysis in PBS  
382 buffer. The peptide with cysteine was added in a w/w ratio of 1:1 and incubated for 2 h,  
383 followed by dialysis in PBS to remove free peptides. A few conjugates were randomly  
384 selected for examination by SDS-PAGE. For the conjugates of biotin-BSA-peptide,  
385 before conjugation, BSA was labelled with biotin by using NHS-LC-Biotin reagent  
386 (Thermo Fisher Scientific, MA, USA) with a molar ratio of 1: 5, and then activated by  
387 Sulfo-SMCC.

388

### 389 *Peptide microarray fabrication*

390 The peptide-BSA conjugates as well as S1 protein, RBD protein and N protein of  
391 SARS-CoV-2, along with the negative (BSA) and positive controls (anti-Human IgG and  
392 IgM antibody), were printed in triplicate on PATH substrate slide (Grace Bio-Labs,  
393 Oregon, USA) to generate identical arrays in a 1 x 7 (for the peptide microarray with  
394 three concentrations) or 2 x 7 subarray format (for the peptide microarray with one

395 concentration) using Super Marathon printer (Arrayjet, UK). The microarrays were stored  
396 at -80°C until use.

397

#### 398 *Microarray-based serum analysis*

399 A 7 or 14-chamber rubber gasket was mounted onto each slide to create individual  
400 chambers for the 7 or 14 identical subarrays. The microarray was used for serum  
401 profiling as described previously with minor modifications[30]. Briefly, the arrays stored  
402 at -80°C were warmed to room temperature and then incubated in blocking buffer (3%  
403 BSA in 1×PBS buffer with 0.1% Tween 20) for 3 h. A total of 400 µL for 7-subarray  
404 format or 200 µL 14-subarray format of diluted sera or antibodies was incubated with  
405 each subarray for 2 h. The sera were diluted at 1:200 for most samples and for  
406 competition experiment, free peptides were added at a concentration of 0.25 mg/mL. For  
407 the enriched antibodies, 0.1-0.5 µg antibodies were included in 200 µL incubation buffer.  
408 The arrays were washed with 1×PBST and bound antibodies were detected by incubating  
409 with Cy3-conjugated goat anti-human IgG and Alexa Fluor 647-conjugated donkey  
410 anti-human IgM (Jackson ImmunoResearch, PA, USA), which were diluted for 1: 1,000  
411 in 1×PBST. The incubation was carried out at room temperature for 1 h. The microarrays  
412 were then washed with 1×PBST and dried by centrifugation at room temperature and  
413 scanned by LuxScan 10K-A (CapitalBio Corporation, Beijing, China) with the  
414 parameters set as 95% laser power/ PMT 550 and 95% laser power/ PMT 480 for IgM  
415 and IgG, respectively. The fluorescent intensity was extracted by GenePix Pro 6.0  
416 software (Molecular Devices, CA, USA).

417

#### 418 *Data analysis of peptide microarray*

419 For each spot, signal intensity was defined as the foreground subtracted by the  
420 background. The signal intensities of the triplicate spots for each peptide or protein were  
421 averaged. For the samples of Cohort 2 and 3, normalization among microarray slides  
422 were performed. For each slide, block #14 was incubated with the positive reference  
423 sample which was generated by pooling of 50 randomly selected sera from COVID-19



424 patients. For each slide, the data generated from the positive reference sample were  
425 subjected to build a linear regression function, and the data from other samples were  
426 subjected to linear normalization according to the function. Graphpad 6.0 was used to  
427 generate ROC plots and calculated AUC values.

428

#### 429 *ELISA*

430 Briefly, 96-well microplates with high binding polystyrene surface (Corning, New York,  
431 USA) were coated with 100  $\mu$ L BSA conjugated peptide (S2-78) at 100  $\mu$ g/mL and  
432 incubated overnight at 4°C. The plates were washed once with PBST buffer (PBS buffer  
433 with 0.1% Tween 20), and blocked with 3% BSA (bovine serum albumin) for 1 h at room  
434 temperature, followed by one wash with PBST. The sera were diluted at 1:50 in PBST  
435 buffer with 1% BSA, 1% FBS and 3% horse serum, 100  $\mu$ L of the preparation was loaded  
436 to each well, the incubation was carried out at 37°C for 1.5 h in 100  $\mu$ L. After six washes  
437 with PBST, the secondary antibody, *i.e.*, anti-human IgG-peroxidase (Sangon Biotech,  
438 Shanghai, China) was diluted at 1:10000 and incubated at 37 ° C for 1 h, followed by  
439 eight washes. Tetramethylbenzidine substrate (Sigma-Aldrich, Missouri, USA) was then  
440 added and incubated for 20 min. Finally, 50  $\mu$ L sulfuric acid (2 M) was added to stop the  
441 reaction. The optical density was read at 450 nm using a Behring EL311 ELISA  
442 microplate reader (Dade Behring Marburg GmbH, Berlin, Germany). The assays were  
443 repeated twice for each sample.

444 **Abbreviations:** AID: autoimmune diseases; AUC: area under curve; CI: confidence  
445 interval; CoV: coronavirus; ELISA: enzyme linked immunosorbent assay; GMP: good  
446 manufacturing practice; NAT: nucleic acid test; NPV: negative predictive value; PPV:  
447 positive predictive value; ROC: receiver operating characteristic; SARS: severe acute  
448 respiratory syndrome; URI: upper respiratory infections; WHO: world health  
449 organization.

450 **Acknowledgments:** We thank Dr. Daniel M. Czajkowsky for critical reading and editing.

451 **Funding:** This work was partially supported by National Key Research and Development  
452 Program of China Grant (No. 2016YFA0500600), Science and Technology Commission

453 of Shanghai Municipality (No. 19441911900), Interdisciplinary Program of Shanghai  
454 Jiao Tong University (No. YG2020YQ10), National Natural Science Foundation of  
455 China (No. 31900112, 21907065, 31970130 and 31670831).

456 **Author contributions:** S-C.T. developed the conceptual ideas and designed the study.  
457 Z-Y.S., F.W., H-Y.H., Y-D.Z., X-S. L., Z-J.Y., H-M.S., J-X.W., L-Y.C., S-Q.L., P-F.P.,  
458 and H.S. collected the sera samples. X-L.F., Y.L., D-Y.L., Q.L., Z-W.X., M-L. M., B.Z.,  
459 H.C., C-Z.Y., J-B.X., X-N.W., Y-X.Z., H-N.Z., H-W.J., H.Q. Y-D.Z., X-S.L., Z-J.Y and  
460 S-J.G. performed the experiments and analysis. S-C.T. and Y.L. wrote the manuscript  
461 with suggestions from other authors.

462 **Competing interests:** Four relevant patents which have been applied in China  
463 (application number: 202010413901.9, 202010415057.3, 202010415053.5 and  
464 202010413911.2) are filed by Shanghai Jiao Tong University. S-C.T., Y.L., D-Y. L,  
465 H-W.J., H-N.Z. and H.Q. are relevant to these patents. Other authors declare no conflicts  
466 of interest.

467 **Data and material availability:** The peptide microarray data generated in this study has  
468 been deposited to Protein Microarray Database (<http://www.proteinmicroarray.cn>) under  
469 the accession number PMDE242 and PMDE244 Additional data related to this study may  
470 be requested from the authors.

471

## 472 **Supplementary Materials**

473

474 Fig. S1. Evaluation of the significant peptides by Cohort 2 – other peptides.

475 Fig. S2. Performance of peptides and S1 for diagnosis in subgroups.

476 Fig. S3. Homology analysis of the significant peptides among SARS-CoV-2,

477 SARS-CoV, MERS-CoV and other four human coronaviruses.

478 Fig. S4. Discrimination of related coronaviruses by combining S1 and peptides of  
479 Panel-A.

480 Table S1. Peptides of SARS-CoV-2 spike protein used in this study

481

482

## 483 References

484

- 485 1. Zhou P, Yang X Lou, Wang XG, et al. A pneumonia outbreak associated with a  
486 new coronavirus of probable bat origin. *Nature* [Internet]. 2020; 579: 270–3.  
487 Available at: <http://dx.doi.org/10.1038/s41586-020-2012-7>
- 488 2. Wu F, Zhao S, Yu B, et al. A new coronavirus associated with human respiratory  
489 disease in China. *Nature*. 2020; 579: 265–9.
- 490 3. Dong E, Du H, Gardner L. An interactive web-based dashboard to track  
491 COVID-19 in real time. *Lancet Infect Dis* [Internet]. 2020; 20: 533–4. Available at:  
492 [http://dx.doi.org/10.1016/S1473-3099\(20\)30120-1](http://dx.doi.org/10.1016/S1473-3099(20)30120-1)
- 493 4. Lee CYP, Lin RTP, Renia L, Ng LFP. Serological Approaches for COVID-19:  
494 Epidemiologic Perspective on Surveillance and Control. *Front Immunol*. 2020; 11:  
495 879.
- 496 5. Long QX, Liu BZ, Deng HJ, et al. Antibody responses to SARS-CoV-2 in patients  
497 with COVID-19. *Nat Med*. 2020; 26: 845–8.
- 498 6. Peeling RW, Wedderburn CJ, Garcia PJ, et al. Serology testing in the COVID-19  
499 pandemic response. *Lancet Infect Dis* [Internet]. 2020; 3099: 30517–X. Available  
500 at: <http://www.ncbi.nlm.nih.gov/pubmed/32687805>
- 501 7. GeurtsvanKessel CH, Okba NMA, Igloi Z, et al. An evaluation of COVID-19  
502 serological assays informs future diagnostics and exposure assessment. *Nat*  
503 *Commun*. 2020; 11: 3436.
- 504 8. Yan Y, Chang L, Wang L. Laboratory testing of SARS-CoV, MERS-CoV, and  
505 SARS-CoV-2 (2019-nCoV): Current status, challenges, and countermeasures. *Rev*  
506 *Med Virol*. 2020; 30: e2106.
- 507 9. Jiang H, Li Y, Zhang H, et al. Global profiling of SARS-CoV-2 specific IgG/ IgM  
508 responses of convalescents using a proteome microarray. *Nat Commun*. 2020; 11:  
509 3581.
- 510 10. Vabret N, Britton GJ, Gruber C, et al. Immunology of COVID-19: Current State of  
511 the Science. *Immunity*. 2020; 52: 910–41.
- 512 11. Petherick A. Developing antibody tests for SARS-CoV-2. *Lancet*. 2020; 395:  
513 1101–2.
- 514 12. Lisboa Bastos M, Tavaziva G, Abidi SK, et al. Diagnostic accuracy of serological  
515 tests for covid-19: Systematic review and meta-analysis. *BMJ*. 2020; 370: m2516.
- 516 13. Hicks J, Klumpp-Thomas C, Kalish H, et al. Serologic cross-reactivity of  
517 SARS-CoV-2 with endemic and seasonal Betacoronaviruses. *medRxiv* [Internet].  
518 2020; DOI: 10.1101/2020.06.22.20137695. Available at:  
519 [https://www.medrxiv.org/content/10.1101/2020.06.22.20137695v1%0Ahttps://ww  
520 w.medrxiv.org/content/10.1101/2020.06.22.20137695v1.abstract](https://www.medrxiv.org/content/10.1101/2020.06.22.20137695v1%0Ahttps://www.medrxiv.org/content/10.1101/2020.06.22.20137695v1.abstract)
- 521 14. Wang H, Hou X, Wu X, et al. SARS-CoV-2 proteome microarray for mapping  
522 COVID-19 antibody interactions at amino acid resolution. *bioRxiv* [Internet]. 2020;  
523 DOI: 10.1101/2020.03.26.994756. Available at:  
524 <http://biorxiv.org/content/early/2020/03/28/2020.03.26.994756>
- 525 15. Poh CM, Carissimo G, Wang B, et al. Two linear epitopes on the SARS-CoV-2  
526 spike protein that elicit neutralising antibodies in COVID-19 patients. *Nat*  
527 *Commun*. 2020; 11: 2806.

- 528 16. Zamecnik CR, Rajan J V, Yamauchi KA, et al. ReScan, a Multiplex Diagnostic  
529 Pipeline, Pans Human Sera for SARS-CoV-2 Antigens. medRxiv. 2020;  
530 DOI:10.1101/2020.05.11.20092528.
- 531 17. Li Y, Lai D, Zhang H, et al. Linear epitopes of SARS-CoV-2 spike protein elicit  
532 neutralizing antibodies in COVID-19 patients. medRxiv [Internet]. 2020;  
533 DOI:10.1101/2020.06.07.20125096. Available at:  
534 <http://medrxiv.org/content/early/2020/06/09/2020.06.07.20125096.abstract>
- 535 18. WHO. WHO Laboratory testing for 2019 novel coronavirus (2019-nCoV) in  
536 suspected human cases. 2020.
- 537 19. Xu X, Sun J, Nie S, et al. Seroprevalence of immunoglobulin M and G antibodies  
538 against SARS-CoV-2 in China. Nat Med. 2020; DOI: 10.1038/s41591-020-0949-6.
- 539 20. Slot E, Hogema BM, Reusken CBEM, Reimerink JH, Molier M, Karregat JH.  
540 Herd immunity is not a realistic exit strategy during a COVID-19 outbreak. Nat  
541 Res. 2020; DOI: 10.21203/rs.3.rs-25862/v1.
- 542 21. Sikora M, von Bülow S, Blanc FEC, Gecht M, Covino R, Hummer G. Map of  
543 SARS-CoV-2 spike epitopes not shielded by glycans. bioRxiv [Internet]. 2020;  
544 DOI: 10.1101/2020.07.03.186825. Available at:  
545 <http://biorxiv.org/content/early/2020/07/03/2020.07.03.186825.abstract>
- 546 22. Xiang F, Wang X, He X, et al. Antibody Detection and Dynamic Characteristics in  
547 Patients with COVID-19. Clin Infect Dis. 2020; DOI: 10.1093/cid/ciaa461.
- 548 23. Long QX, Tang XJ, Shi QL, et al. Clinical and immunological assessment of  
549 asymptomatic SARS-CoV-2 infections. Nat Med. 2020; DOI:  
550 10.1038/s41591-020-0965-6.
- 551 24. Lei Q, Li Y, Hou H, et al. Antibody dynamics to SARS-CoV-2 in asymptomatic  
552 COVID-19 infections. medRxiv. 2020; DOI: [org/10.1101/2020.07.09.20149633](https://doi.org/10.1101/2020.07.09.20149633).
- 553 25. Zhang X, Wu X, Wang D, et al. Proteome-wide analysis of  
554 differentially-expressed SARS-CoV-2 antibodies in early COVID-19 infection.  
555 medRxiv [Internet]. 2020; DOI:10.1101/2020.04.14.20064535. Available at:  
556 [https://www.medrxiv.org/content/10.1101/2020.04.14.20064535v2?%253fcollecti  
557 on=](https://www.medrxiv.org/content/10.1101/2020.04.14.20064535v2?%253fcollection=)
- 558 26. Li Y, Ma M, Lei Q, et al. Linear epitope landscape of SARS-CoV-2 Spike protein  
559 constructed from 1,051 COVID-19 patients. medRxiv [Internet]. 2020;  
560 DOI:10.1101/2020.07.13.20152587. Available at:  
561 <http://medrxiv.org/content/early/2020/07/14/2020.07.13.20152587.abstract>
- 562 27. Wan J, Xing S, Ding L, et al. Human IgG cell neutralizing monoclonal antibodies  
563 block SARS- CoV-2 infection. Cell Rep. 2020; 32: 107918.
- 564 28. Croop B, Zhang C, Lim Y, Gelfand RM, Han KY. Recent advancement of  
565 light-based single-molecule approaches for studying biomolecules. Wiley  
566 Interdiscip Rev Syst Biol Med. 2019; 11: e1445.
- 567 29. McEachern F, Harvey E, Merle G. Emerging Technologies for the Electrochemical  
568 Detection of Bacteria. Biotechnol J. 2020; e2000140.
- 569 30. Li Y, Li C-Q, Guo S-J, et al. Longitudinal serum autoantibody repertoire profiling  
570 identifies surgery-associated biomarkers in lung adenocarcinoma. EBioMedicine.  
571 2020; 53: 102674.
- 572
- 573

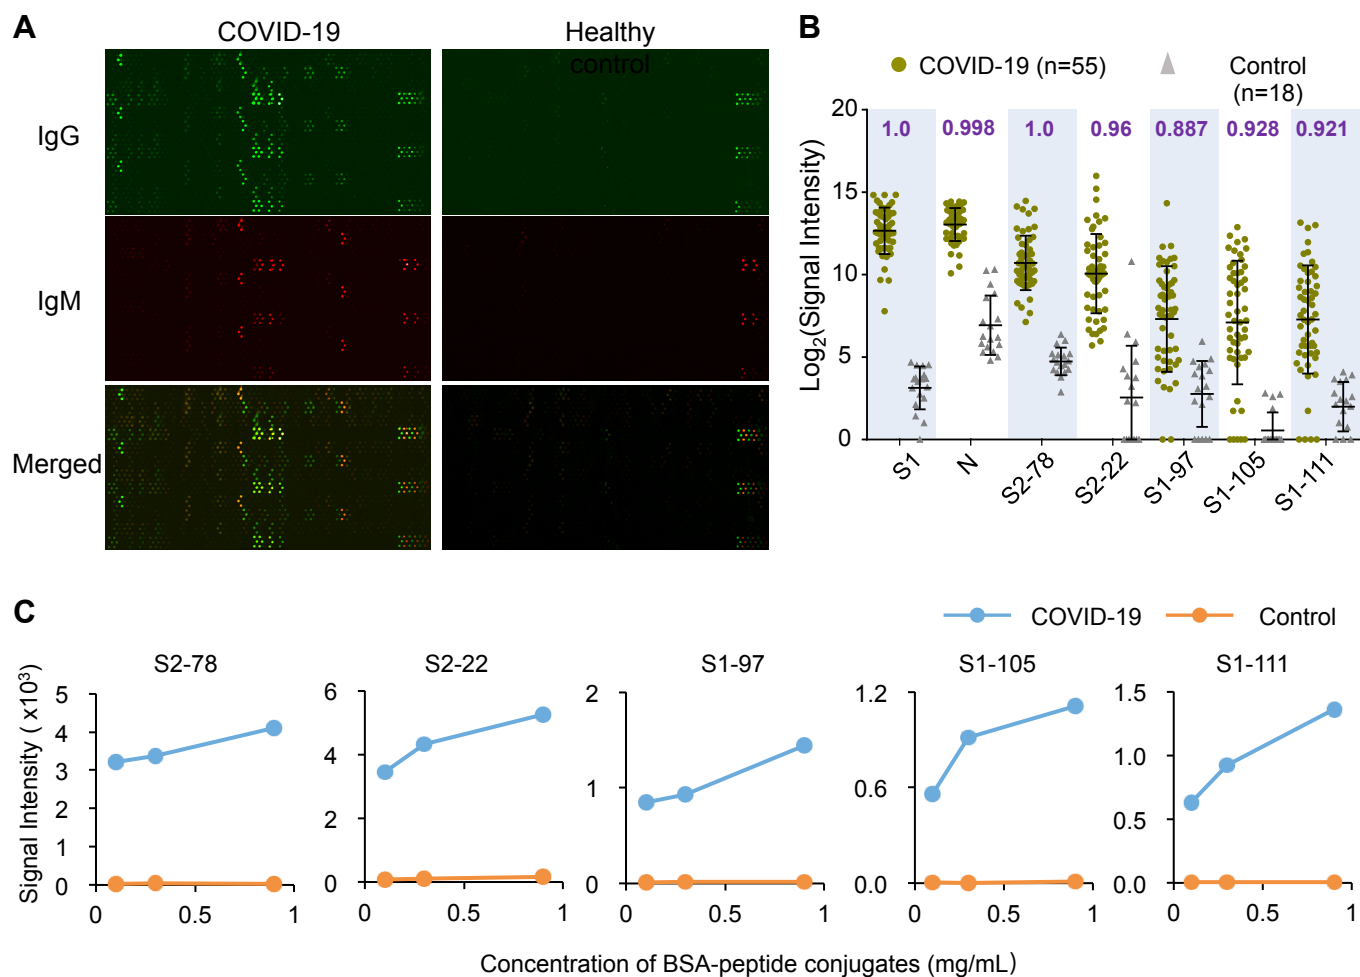

**Figure 1. Peptides with strong IgG antibody responses were identified by Cohort 1.** **A.** Representative images of peptide microarray profiled by sera from a COVID patient and a healthy control. IgG (green) and IgM (red) were detected simultaneously. **B.** Box plot of IgG antibody responses against S1 protein, N protein and some significant peptides for COVID-19 patient group (n=55) and control group (n=18) of Cohort 1. Each spot indicates one serum sample. Data are presented as box plots where the middle line is the mean value, and the upper and lower hinges are mean values  $\pm$  SD. AUC (area under curve) values are labeled for each peptide or protein on the top of the box plots. **C.** Averaged signal intensities of IgG antibody responses against the indicated peptides at different concentrations, *i.e.* 0.1, 0.3 and 0.9 mg/mL, both for COVID-19 patients (blue line) and control group (orange line).

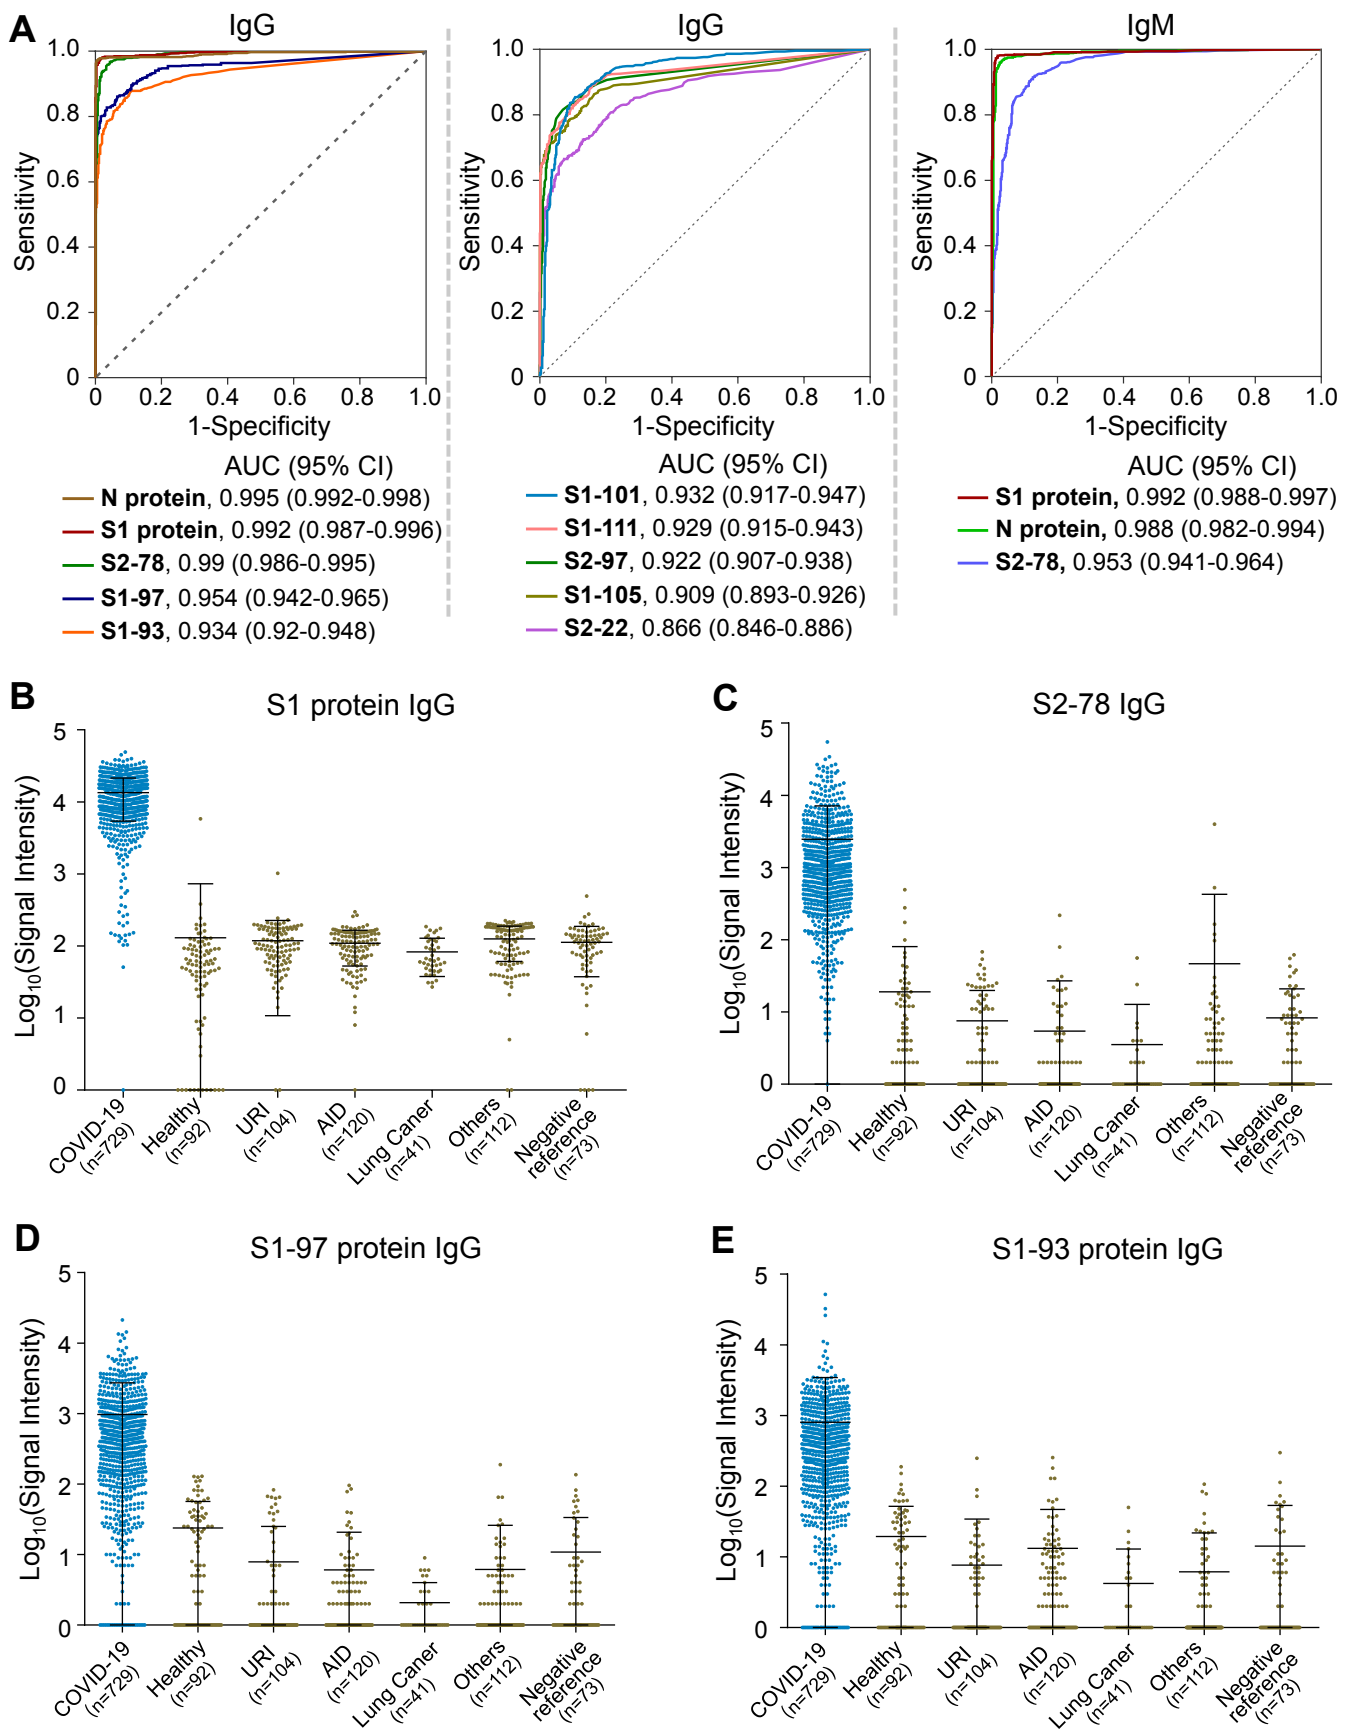

**Figure 2. Evaluation significant peptides by Cohort 2.** **A.** ROCs (receiver operating curves) of the peptides or proteins for discrimination of the COVID-19 group (n=729) and the control group (n=542). The AUC values with 95% CI (confidential intervals) are provided for all the peptides and proteins. **B-E.** signal distributions of anti-S1 IgG (B), anti-S2-78 IgG (C), anti-S1-97 IgG (D) and anti-S1-93 (E) in COVID-19 patients (blue) and control groups (yellow). Sample size is indicated for each group. URI: upper respiratory infection, AID: patients with autoimmune diseases.



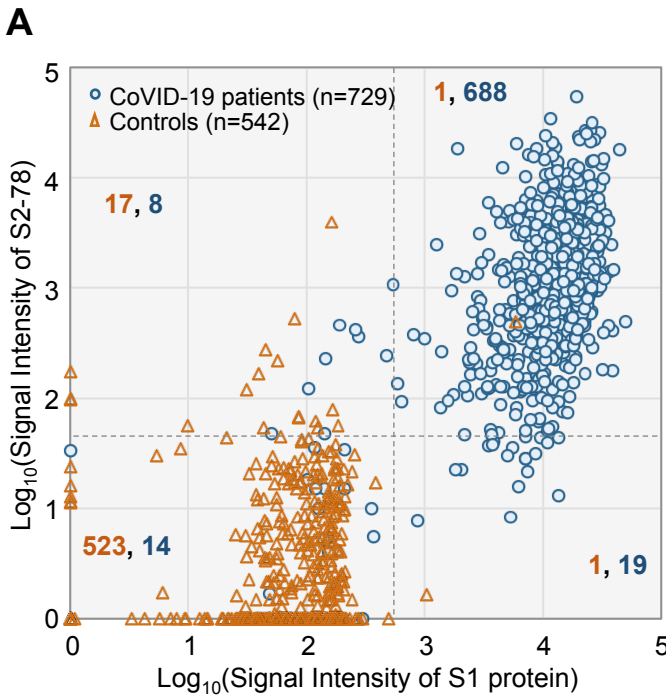

**B**

|         |                   | S2-78    |          |              |
|---------|-------------------|----------|----------|--------------|
|         |                   | Positive | Negative | Consistency  |
| S1      | COVID-19 Positive | 688      | 19       | 96.3%        |
|         | COVID-19 Negative | 8        | 14       | (94.7-97.5%) |
| Control | Control Positive  | 1        | 1        | 96.7%        |
|         | Control Negative  | 17       | 523      | (94.8-98%)   |

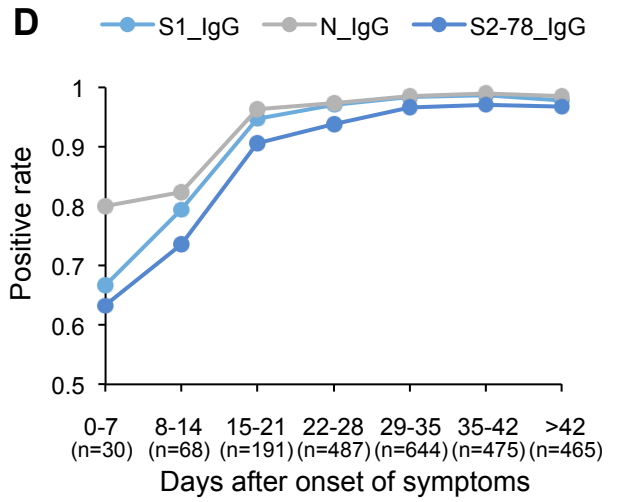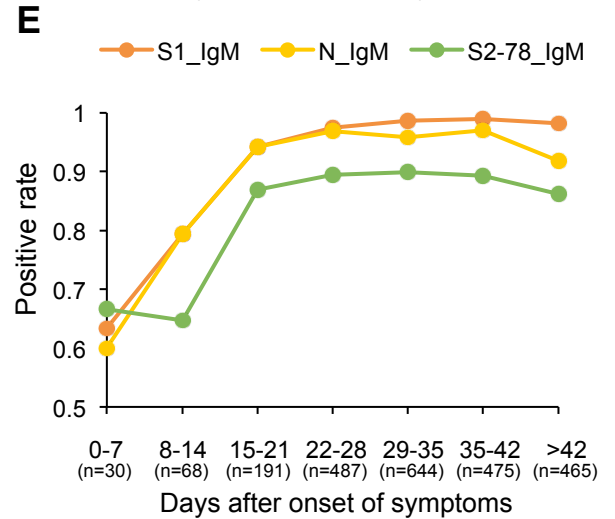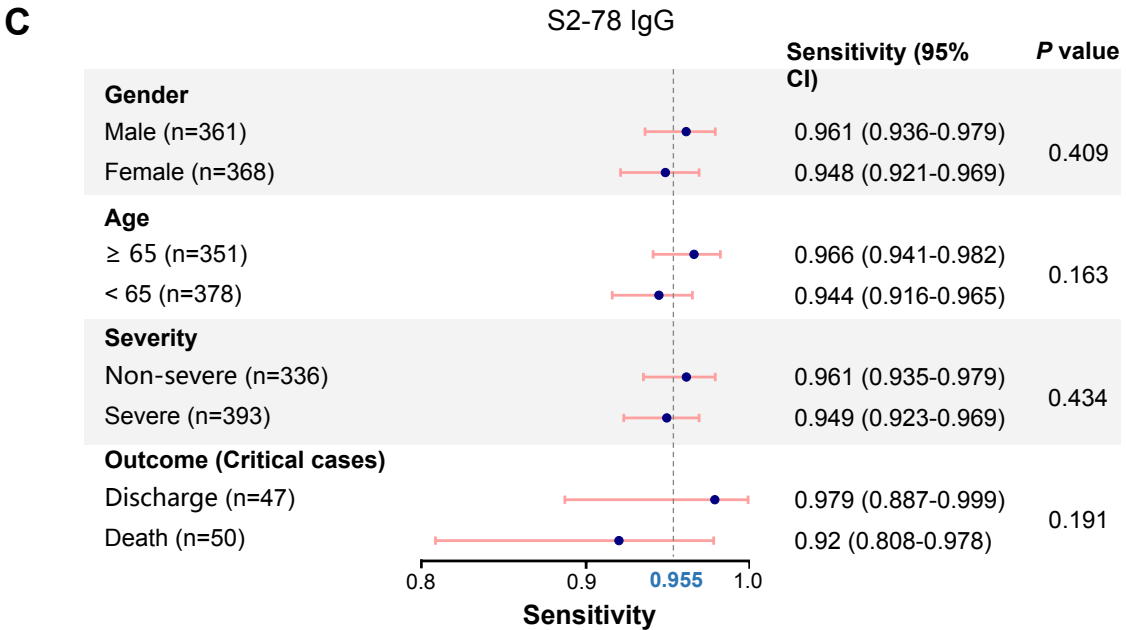

**Figure 3. S2-78 IgG for diagnosis of COVID-19.** **A.** Scatter plots of sera samples from COVID-19 (blue dots) and controls (orange triangle) for S1 IgG vs. S2-8 IgG. The grey lines indicate the cut-off values set as the optimal Youden index based on the ROC. The orange and blue numbers indicate the sample counts of control and patient on each quadrant, respectively. **B.** consistency between S1 protein and S2-78. The consistency values are provided with 95% CI. **C.** forest plot of sensitivities of S2-78 IgG among subgroups, i.e., age, gender, severity and outcome. The dots indicate the sensitivities while the error bars indicate the 95% CI. The exact values are also provided. P values were calculated with  $\chi^2$  test. **D-E.** Graph of positive rates of IgG or IgM against the S, N proteins or S2-78 versus days after symptom onset in 2,360 serum samples from 784 patients.

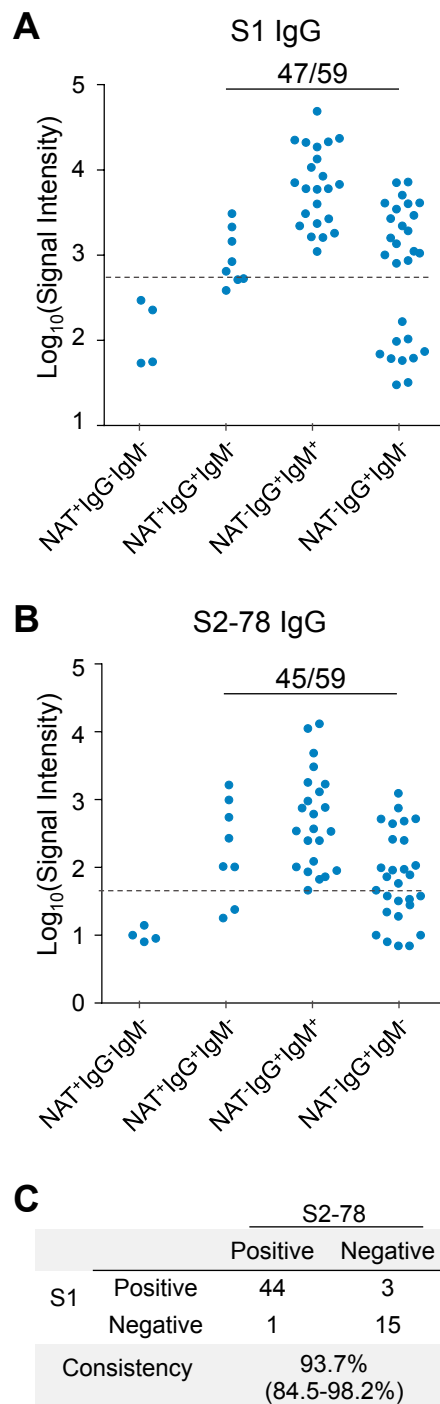

**Figure 4. S2-78 IgG for diagnosis of asymptomatic patients. A-B.** Levels of S1 IgG and S2-78 IgG in asymptomatic patient groups divided by positive or negative among three tests, i.e., NAT (nucleic acid test), SARS-CoV-2 virus specific IgG and IgM antibodies. The dashed lines indicate the cut-off values. The number of positive samples as well as the total number of samples of IgG<sup>+</sup> (IgG positive) groups were presented for S1 IgG and S2-78 IgG. **C.** The consistency between S1 IgG and S2-78 IgG.

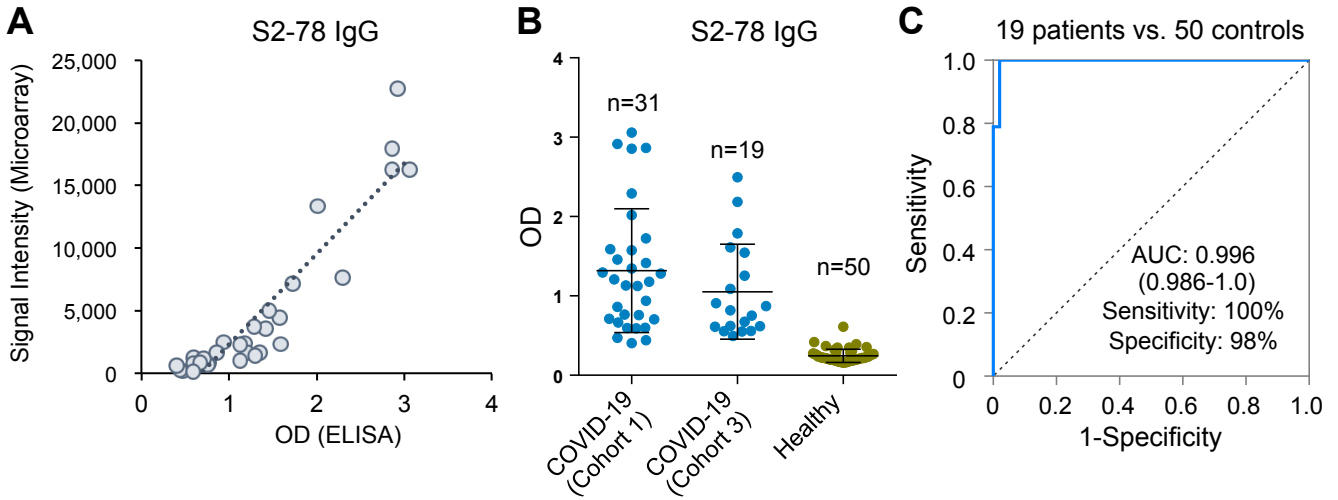

**Figure 5. ELISA validation of S2-78 by Cohort 3.** **A.** Correlation of the signals of S2-78 IgG response between peptide microarray and ELISA with Cohort 1 (n=31). **B.** Levels of S2-78 IgG in samples from COVID-19 patients either from Cohort 1 (n=31) or Cohort 3 (n=19) and healthy controls (n=50). **C.** ROC of S2-78 IgG for discrimination of 19 COVID-patients (Cohort 3) and 50 healthy controls.

**A**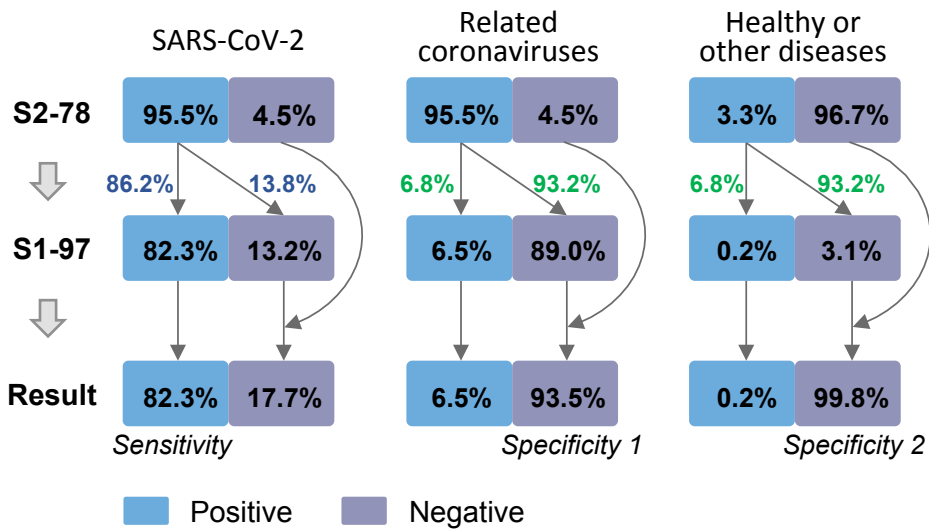**B**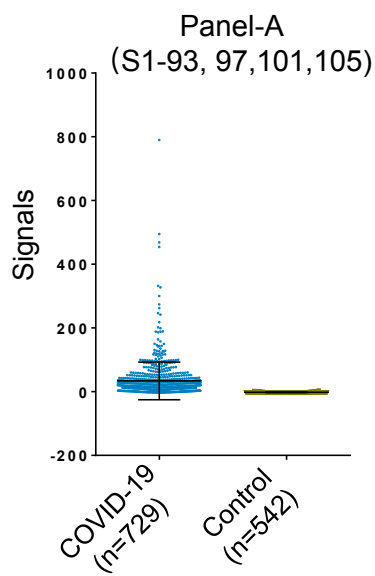**C**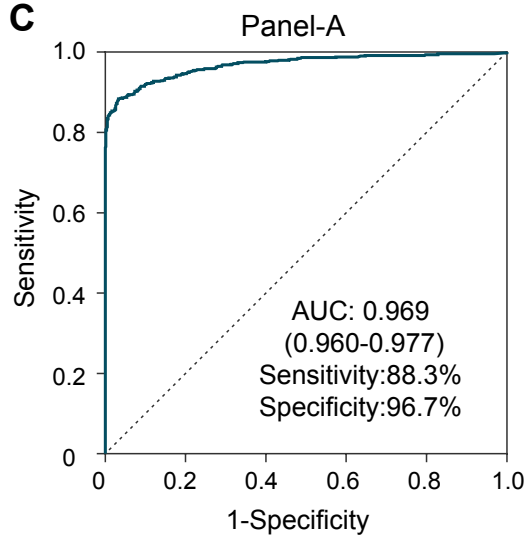**D**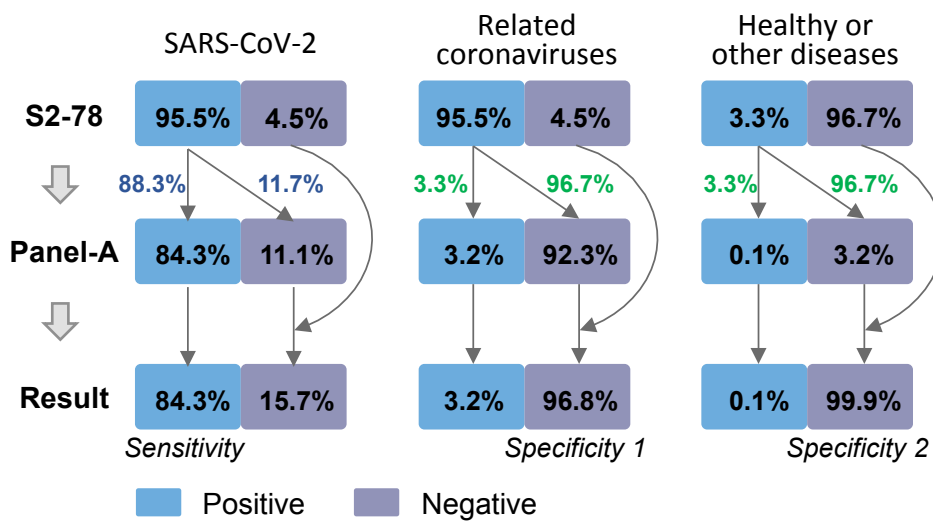

**Figure 6. Discrimination of related coronaviruses with combination of peptides.**

**A.** Illustration of the strategy with combination of S2-78 IgG and S1-97 IgG based on the results of Cohort 2 (729 patients and 542 controls). For any given sample, the first step is to detect S2-78 IgG response. For the positive ones, the second step is to detect S1-97 IgG response. The blue numbers indicate the positive or negative rates for SARS-CoV-2 infections, while the green numbers indicated the assumed positive or negative rates for samples not belong the SARS-CoV-2 group. The last step summaries the overall sensitivities and specificities for different sample groups. **B.** Signals of Panel-A (S1-93, 97, 101 and 105 in COVID-19 patients and control groups. **C.** The corresponding ROC of Panel-A. **D.** The performance of the combination of S2-78 IgG and Panel-A.



**Table 2.** The overall performance of S1 and S2-78 for diagnosis

|                      |      | S1                 |          | S2-78              |          |
|----------------------|------|--------------------|----------|--------------------|----------|
|                      |      | Positive           | Negative | Positive           | Negative |
| COVID-19             |      | 707                | 22       | 696                | 33       |
| Control              |      | 2                  | 540      | 18                 | 524      |
| Specificity (95% CI) |      | 99.6% (98.7-100%)  |          | 96.7% (94.8-98.0%) |          |
| Sensitivity (95% CI) |      | 97% (95.5-98.1%)   |          | 95.5% (93.7-96.9%) |          |
| Accuracy (95% CI)    |      | 98.1% (97.2-98.8%) |          | 96% (94.8-97%)     |          |
| Prevalence           |      |                    |          |                    |          |
| PPV                  | 0.04 | 91.0%              |          | 54.7%              |          |
|                      | 0.5  | 99.6%              |          | 97.5%              |          |
| NPV                  | 0.04 | 99.9%              |          | 99.8%              |          |
|                      | 0.5  | 97.1%              |          | 95.6%              |          |

PPV: positive predictive value

NPV: negative predictive value

**Table 1. Patients and controls involved in this study.**

|                      |            | Cohort 1                       |                                    | Cohort 2                                                                             |                                                                                                                    |                                                        | Cohort 3                                                        |                            | Cohort 4                                                                      |
|----------------------|------------|--------------------------------|------------------------------------|--------------------------------------------------------------------------------------|--------------------------------------------------------------------------------------------------------------------|--------------------------------------------------------|-----------------------------------------------------------------|----------------------------|-------------------------------------------------------------------------------|
| Group                |            | COVID-19                       | Control                            | COVID-19                                                                             | Control-1                                                                                                          | Control-2                                              | COVID-19                                                        | Control                    | Asymptomatic patient <sup>1</sup>                                             |
| Numbers              |            | 55                             | 18                                 | 729                                                                                  | 469                                                                                                                | 73                                                     | 19                                                              | 50                         | 63                                                                            |
| Stage                |            | Convalescent                   | -                                  | In hospital                                                                          | -                                                                                                                  | -                                                      | Convalescent                                                    | -                          | -                                                                             |
| Age                  |            | 41.5±14.9                      | 50.4±12.5                          | 61.4±14.5                                                                            | 53.7±20.6                                                                                                          | N/A                                                    | 53.9±13.2                                                       | 46.7±20.2                  | 44.9±16.5                                                                     |
| Gender               | Male       | 27                             | 8                                  | 361                                                                                  | 224                                                                                                                | N/A                                                    | 10                                                              | 24                         | 25                                                                            |
|                      | Female     | 28                             | 10                                 | 368                                                                                  | 245                                                                                                                | N/A                                                    | 9                                                               | 26                         | 38                                                                            |
| Severity             | Severe     | 0                              | -                                  | 393                                                                                  | -                                                                                                                  | -                                                      | 0                                                               | -                          | -                                                                             |
|                      | non-severe | 55                             | -                                  | 336                                                                                  | -                                                                                                                  | -                                                      | 19                                                              | -                          | -                                                                             |
| Outcome              | Discharge  | 55                             | -                                  | 679                                                                                  | -                                                                                                                  | -                                                      | 19                                                              | -                          | -                                                                             |
|                      | Death      | 0                              | -                                  | 50                                                                                   | -                                                                                                                  | -                                                      | 0                                                               | -                          | -                                                                             |
| Days after onset     |            | 27.5±7.7                       | -                                  | 31.1±8.8                                                                             | -                                                                                                                  | -                                                      | 42.6±9.5                                                        | -                          | -                                                                             |
| Source               |            | Foshan 4th Hospital, Guangdong | Ruijin Hospital, Shanghai          | Tongji Hospital, Wuhan                                                               | Tongren Hospital, Shanghai<br>Ruijin Hospital, Shanghai                                                            | National Institutes for Food and Drug Control, Beijing | The Fifth Affiliated Hospital Sun Yat-Sen University, Guangdong | Tongren Hospital, Shanghai | Tongji Hospital, Wuhan                                                        |
| Subtypes and numbers |            | -                              | Healthy: 8;<br>LC <sup>4</sup> : 8 | This is a subgroup of a cohort of 784 cases with a total of 2,360 longitudinal sera. | Healthy: 92;<br>URI <sup>2</sup> : 104;<br>AID <sup>3</sup> : 120;<br>LC <sup>4</sup> : 41;<br>Other diseases: 112 | Negative reference samples                             | -                                                               | -                          | NAT+IgG-IgM-: 4;<br>NAT+IgG+IgM-: 8;<br>NAT-IgG+IgM+: 23;<br>NAT-IgG+IgM-: 28 |

<sup>1</sup>Asymptomatic patients: positive for NAT (nucleic acid test) or antibody (IgG or IgM) performed in hospital.

<sup>2</sup>URI: Upper respiratory infection

<sup>3</sup>AID: Autoimmune diseases

<sup>4</sup>LC: Lung cancer

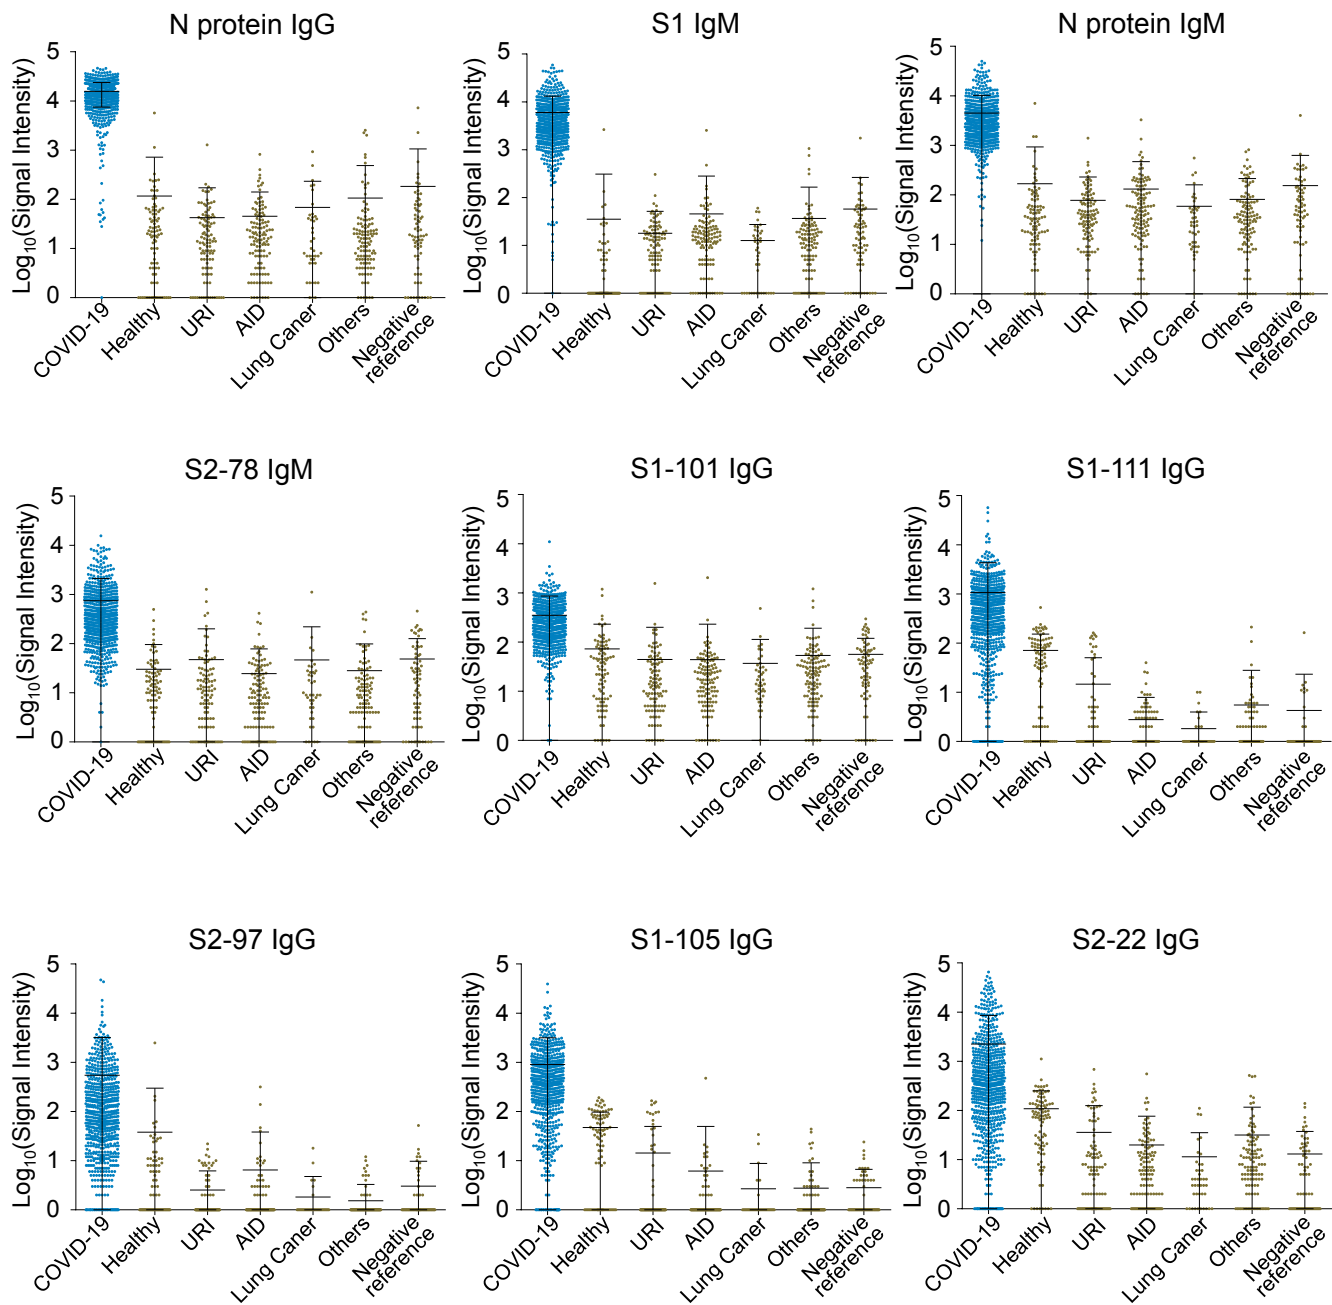

**Figure S1. Evaluation of the significant peptides by Cohort 2 – other peptides.** Signal levels of the antibodies against the indicated peptides in COVID-19 patients (n=729), Healthy controls (n=92), upper respiratory infections (URI, n=104), patients with autoimmune diseases (AID, n=120), lung cancer patients (n=41), patients with other diseases (n=112) and negative reference samples (n=73) of Cohort 2.

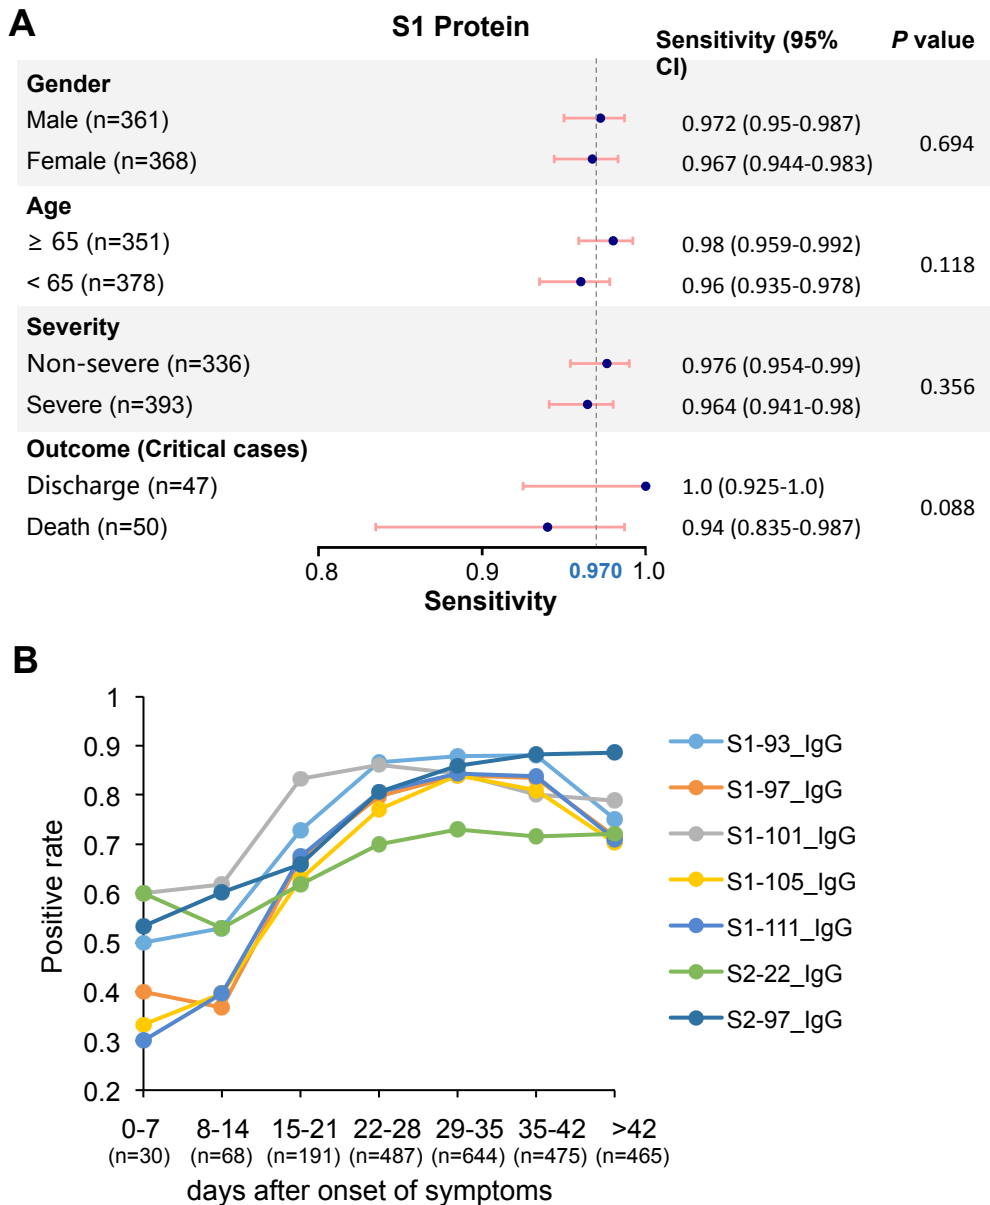

**Figure S2. Performance of peptides and S1 for diagnosis in subgroups. A.** forest plot of sensitivities of S1 IgG in different subgroups, i.e., age, gender, severity and outcome. The dots indicate the sensitivities while the error bars indicate the 95% CI. The exact values are also provided. P values were calculated with  $\chi^2$  test. **B.** Graph of positive rates of IgG antibodies against the indicated peptides versus days after symptom onset in 2,360 serum samples from 784 patients.

| S1-93      |     |                        | S1-97 |            |     |                     |     |
|------------|-----|------------------------|-------|------------|-----|---------------------|-----|
| SARS-CoV-2 | 553 | TESNKKFL-PFQQ          | 564   | SARS-CoV-2 | 577 | RDPQTLEILDIT        | 588 |
| SARS-CoV   | 539 | <b>TPSSKRFQ-PFQQ</b>   | 550   | SARS-CoV   | 563 | <b>RDPKTSEILDIS</b> | 574 |
| MERS-CoV   | 618 | QNCTAVGV-RQQR          | 629   | MERS-CoV   | 643 | SD--DGNYCLR         | 652 |
| HCoV-0C43  | 636 | <b>VEVNATYYNSWQN</b>   | 648   | HCoV-0C43  | 661 | <b>RDYIINRTFMIR</b> | 672 |
| HCoV-HKU1  | 636 | <b>KEVSAVYYNSWQN</b>   | 648   | HCoV-HKU1  | 661 | <b>KDFVTNKTYNIF</b> | 672 |
| HCoV-NL63  | 642 | RS <b>SNQ</b> SLAGG--- | 651   | HCoV-NL63  | 665 | <b>KNVSTGNIFIVT</b> | 676 |
| HCoV-229E  | 458 | RI <b>SND</b> TFLNG--- | 467   | HCoV-229E  | 481 | <b>KDVTNGTIYSIT</b> | 492 |

  

| S1-101     |     |                      | S1-105 |            |     |                         |     |
|------------|-----|----------------------|--------|------------|-----|-------------------------|-----|
| SARS-CoV-2 | 601 | GTNTSNQVAVLY         | 612    | SARS-CoV-2 | 625 | HADQLT--PTWRVY          | 636 |
| SARS-CoV   | 587 | <b>GTNASSEVAVLY</b>  | 598    | SARS-CoV   | 611 | <b>HADQLT--PAWRIY</b>   | 622 |
| MERS-CoV   | 665 | --KETK <b>THATLF</b> | 674    | MERS-CoV   | 686 | <b>SQYSRSTRSMLKRR</b>   | 697 |
| HCoV-0C43  | 685 | --AN <b>SSEPALLF</b> | 694    | HCoV-0C43  | 706 | L <b>TRQLQ</b> --PINYFD | 717 |
| HCoV-HKU1  | 685 | --Q <b>NASSLALLY</b> | 694    | HCoV-HKU1  | 706 | S---- <b>LATQ</b> ----- | 710 |
| HCoV-NL63  | 689 | Q-----               | 689    | HCoV-NL63  | 701 | <b>SRYGLQ</b> NLLQLP--  | 712 |
| HCoV-229E  | 505 | Q-----               | 505    | HCoV-229E  | 517 | <b>TSYGF</b> SNVVEMP--  | 528 |

  

| S1-111     |     |                      | S2-78 |            |      |                              |      |
|------------|-----|----------------------|-------|------------|------|------------------------------|------|
| SARS-CoV-2 | 661 | ECDIPIGAGICA         | 672   | SARS-CoV-2 | 1148 | <b>FKEELDKYFKNH</b>          | 1159 |
| SARS-CoV   | 647 | <b>ECDIPIGAGICA</b>  | 658   | SARS-CoV   | 1130 | <b>FKEELDKYFKNH</b>          | 1141 |
| MERS-CoV   | 726 | D <b>CKLPLGQSLCA</b> | 737   | MERS-CoV   | 1231 | <b>FQDELDEFKQNV</b>          | 1242 |
| HCoV-0C43  | 737 | T <b>CDLTVGSGYCV</b> | 748   | HCoV-0C43  | 1233 | <b>FKEELDQWFKNQ</b>          | 1244 |
| HCoV-HKU1  | 685 | <b>SCALRMGSGFCV</b>  | 694   | HCoV-HKU1  | 1234 | <b>FSELSHWFKNQ</b>           | 1245 |
| HCoV-NL63  | 727 | AVMTYS <b>NFGICA</b> | 738   | HCoV-NL63  | 1217 | <b>VNKT</b> LQEF <b>AQNL</b> | 1228 |
| HCoV-229E  | 543 | AVLTYSS <b>FQVCA</b> | 554   | HCoV-229E  | 1033 | <b>VNKT</b> LQEL <b>SYKL</b> | 1044 |

  

| S2-22      |     |                      | S2-97 |            |      |                      |      |
|------------|-----|----------------------|-------|------------|------|----------------------|------|
| SARS-CoV-2 | 812 | PSKRSFIEDLLF         | 823   | SARS-CoV-2 | 1262 | EPVLKGVKLHYT         | 1273 |
| SARS-CoV   | 794 | <b>PTKRSFIEDLLF</b>  | 805   | SARS-CoV   | 1244 | <b>EPVLKGVKLHYT</b>  | 1255 |
| MERS-CoV   | 884 | RSARSA <b>IEDLLF</b> | 895   | MERS-CoV   | 1346 | <b>EPHKVHVH</b> ---- | 1353 |
| HCoV-0C43  | 900 | ASSR <b>SAIEDLLF</b> | 911   | HCoV-0C43  | 1343 | <b>ELVIK</b> -TSHDD- | 1353 |
| HCoV-HKU1  | 902 | - <b>SSRSFFEDLLF</b> | 912   | HCoV-HKU1  | 1347 | <b>DFVIK</b> -TSHDD- | 1356 |
| HCoV-NL63  | 867 | IAGR <b>SAIEDLLF</b> | 878   | HCoV-NL63  | 1352 | VHVQ-----            | 1356 |
| HCoV-229E  | 683 | VAGR <b>SAIEDILF</b> | 694   | HCoV-229E  | 1166 | IHIQ-----            | 1170 |

**Figure S3. Homology analysis of the significant peptides among SARS-CoV-2, SARS-CoV, MERS-CoV and other four human coronaviruses.** The line for each position indicates the gap. The bold letters indicate the positions with the same amino acids as that of SARS-CoV-2. The homology analysis was performed by an online tool called Clustal Omega (<https://www.ebi.ac.uk/Tools/msa/clustalo/>).

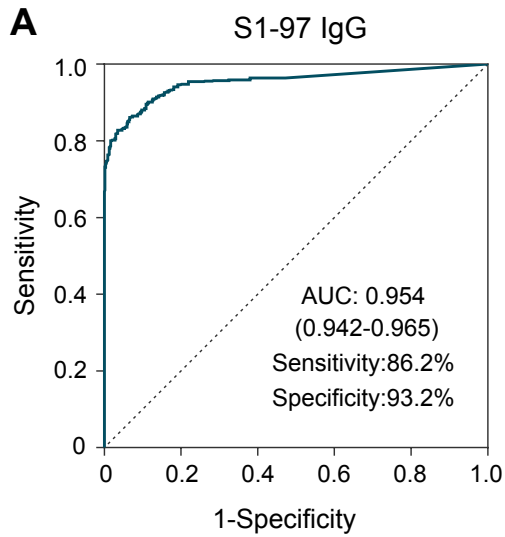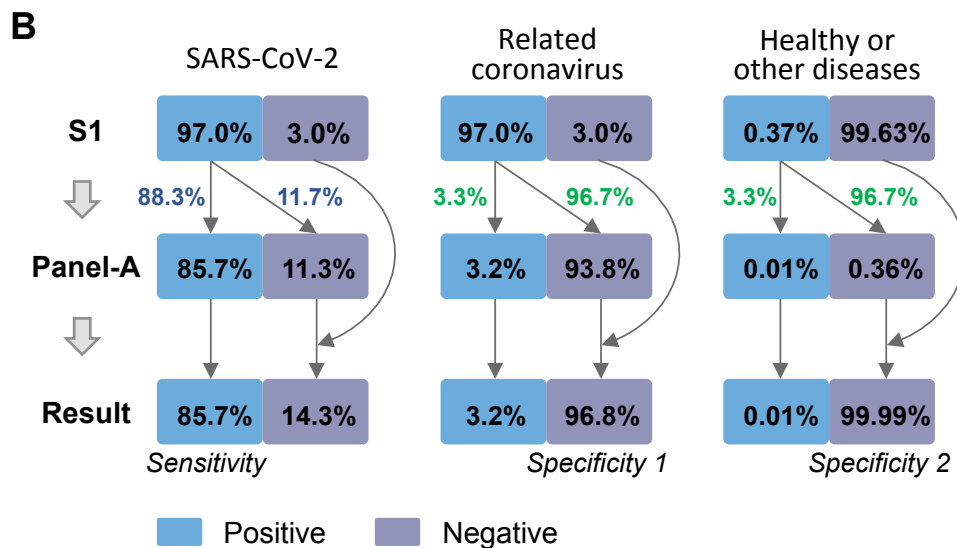

**Figure S4. Discrimination of related coronaviruses by combining S1 and peptides of Panel-A.** **A.** ROC of S1-97 IgG based on the results of Cohort 2. **B.** The combination of S1 IgG and Panel-A based on the results of Cohort 2 (729 patients and 542 controls).



**Table S1. The peptides synthesized in this study**

| <b>NO.</b> | <b>Peptide ID</b> | <b>Sart Position</b> | <b>Amino acid sequence</b> | <b>End Position</b> | <b>Note</b> |
|------------|-------------------|----------------------|----------------------------|---------------------|-------------|
| 1          | S1-1              | 1                    | MFVFLVLLPLVS               | 12                  | N/A         |
| 2          | S1-2              | 7                    | LLPLVSSQCVNL               | 18                  |             |
| 3          | S1-3              | 13                   | SQCVNLTTRTQL               | 24                  | N/A         |
| 4          | S1-4              | 19                   | TTRTQLPPAYTN               | 30                  |             |
| 5          | S1-5              | 25                   | PPAYTNSFTRGV               | 36                  |             |
| 6          | S1-6              | 31                   | SFTRGVVYYPDKV              | 42                  |             |
| 7          | S1-7              | 37                   | YYPDKVFRSSVL               | 48                  |             |
| 8          | S1-8              | 43                   | FRSSVLHSTQDL               | 54                  |             |
| 9          | S1-9              | 49                   | HSTQDLFLPFFS               | 60                  |             |
| 10         | S1-10             | 55                   | FLPFFSNVTWFH               | 66                  | N/A         |
| 11         | S1-11             | 61                   | NVTWFHAIHVSG               | 72                  |             |
| 12         | S1-12             | 67                   | AIHVSGTNGTKR               | 78                  |             |
| 13         | S1-13             | 73                   | TNGTKRFDNPVL               | 84                  |             |
| 14         | S1-14             | 79                   | FDNPVLPFNDGV               | 90                  |             |
| 15         | S1-15             | 85                   | PFNDGVYFASTE               | 96                  |             |
| 16         | S1-16             | 91                   | YFASTEKSNIR                | 102                 |             |
| 17         | S1-17             | 97                   | KSNIRGWIFGT                | 108                 |             |
| 18         | S1-18             | 103                  | GWIFGTTLDSKT               | 114                 |             |
| 19         | S1-19             | 109                  | TLDSKTQSLIV                | 120                 |             |
| 20         | S1-20             | 115                  | QSLIVNNATNV                | 126                 |             |
| 21         | S1-21             | 121                  | NNATNVVIKVCE               | 132                 |             |
| 22         | S1-22             | 127                  | VIKVICEFQFCND              | 138                 |             |
| 23         | S1-23             | 133                  | FQFCNDPFLGVY               | 144                 |             |
| 24         | S1-24             | 139                  | PFLGVVYHKNNK               | 150                 |             |
| 25         | S1-25             | 145                  | YHKNNKSWMESE               | 156                 |             |
| 26         | S1-26             | 151                  | SWMESEFRVYSS               | 162                 |             |
| 27         | S1-27             | 157                  | FRVYSSANNCTF               | 168                 |             |
| 28         | S1-28             | 163                  | ANNCTFEYVSQP               | 174                 |             |
| 29         | S1-29             | 169                  | EYVSQPFMDLE                | 180                 |             |
| 30         | S1-30             | 175                  | FLMDLEGKQGNF               | 186                 |             |
| 31         | S1-31             | 181                  | GKQGNFKNLREF               | 192                 |             |
| 32         | S1-32             | 187                  | KNLREFVFKNID               | 198                 | N/A         |
| 33         | S1-33             | 193                  | VFKNIDGYFKIY               | 204                 | N/A         |
| 34         | S1-34             | 199                  | GYFKIYSKHTPI               | 210                 |             |
| 35         | S1-35             | 205                  | SKHTPINLVRDL               | 216                 | N/A         |
| 36         | S1-36             | 211                  | NLVRDLPQGFSFA              | 222                 |             |
| 37         | S1-37             | 217                  | PQGFSALEPLVD               | 228                 | N/A         |
| 38         | S1-38             | 223                  | LEPLVDLPIGIN               | 234                 |             |
| 39         | S1-39             | 229                  | LPIGINITRFQT               | 240                 |             |
| 40         | S1-40             | 235                  | ITRFQTLALHR                | 246                 | N/A         |
| 41         | S1-41             | 241                  | LLALHRSYLTPG               | 252                 |             |
| 42         | S1-42             | 247                  | SYLTPGDSSSGW               | 258                 |             |
| 43         | S1-43             | 253                  | DSSSGWTAGAAA               | 264                 |             |
| 44         | S1-44             | 259                  | TAGAAAYVGYL                | 270                 |             |
| 45         | S1-45             | 265                  | YVGYLQPRTFL                | 276                 |             |
| 46         | S1-46             | 271                  | QPRTFLLYNEN                | 282                 | N/A         |
| 47         | S1-47             | 277                  | LKYNENGTITDA               | 288                 |             |
| 48         | S1-48             | 283                  | GTITDAVDCALD               | 294                 |             |
| 49         | S1-49             | 289                  | VDCALDPLSETK               | 300                 |             |
| 50         | S1-50             | 295                  | PLSETKCTLKSF               | 306                 |             |
| 51         | S1-51             | 301                  | CTLKSFTVEKGI               | 312                 |             |
| 52         | S1-52             | 307                  | TVEKGIYQTSNF               | 318                 |             |
| 53         | S1-53             | 313                  | YQTSNFRVQPTE               | 324                 |             |
| 54         | S1-54             | 319                  | RVQPTEIVRFP                | 330                 |             |
| 55         | S1-55             | 325                  | SIVRFPNITNLC               | 336                 |             |
| 56         | S1-56             | 331                  | NITNLCPFGEVF               | 342                 |             |
| 57         | S1-57             | 337                  | PFGEVFNATRFA               | 348                 |             |
| 58         | S1-58             | 343                  | NATRFAVYAWN                | 354                 |             |
| 59         | S1-59             | 349                  | SVYAWNKRKRISN              | 360                 |             |
| 60         | S1-60             | 355                  | RKRISNCVADYS               | 366                 |             |
| 61         | S1-61             | 361                  | CVADYSVLYNSA               | 372                 | N/A         |
| 62         | S1-62             | 367                  | VLYNSASFSTFK               | 378                 |             |
| 63         | S1-63             | 373                  | SFSTFKCYGVSP               | 384                 |             |
| 64         | S1-64             | 379                  | CYGVSPTKLNDL               | 390                 |             |

|     |        |     |               |     |     |
|-----|--------|-----|---------------|-----|-----|
| 65  | S1-65  | 385 | TKLNDLCFTNVY  | 396 |     |
| 66  | S1-66  | 391 | CFTNVYADSFVI  | 402 |     |
| 67  | S1-67  | 397 | ADSFVIRGDEV   | 408 |     |
| 68  | S1-68  | 403 | RGDEVQRQIAPGQ | 414 |     |
| 69  | S1-69  | 409 | QIAPGQTGKIAD  | 420 |     |
| 70  | S1-70  | 415 | TGKIADYNYKLP  | 426 |     |
| 71  | S1-71  | 421 | YNYKLPDDFTGC  | 432 |     |
| 72  | S1-72  | 427 | DDFTGCVIAWNS  | 438 |     |
| 73  | S1-73  | 433 | VIAWNSNNLDSK  | 444 |     |
| 74  | S1-74  | 439 | NNLDSKVGGNYN  | 450 |     |
| 75  | S1-75  | 445 | VGGNYNYLYRLF  | 456 | N/A |
| 76  | S1-76  | 451 | YLYRLFRRKSNLK | 462 |     |
| 77  | S1-77  | 457 | RKSNLKPFERDI  | 468 |     |
| 78  | S1-78  | 463 | PFERDISTEIYQ  | 474 |     |
| 79  | S1-79  | 469 | STEIYQAGSTPC  | 480 |     |
| 80  | S1-80  | 475 | AGSTPCNGVEGF  | 486 |     |
| 81  | S1-81  | 481 | NGVEGFNCYFPL  | 492 |     |
| 82  | S1-82  | 487 | NCYFPLQSYGFQ  | 498 |     |
| 83  | S1-83  | 493 | QSYGFQPTNGVG  | 504 |     |
| 84  | S1-84  | 499 | PTNGVGYQPYRV  | 510 |     |
| 85  | S1-85  | 505 | YQPYRVVLSFE   | 516 |     |
| 86  | S1-86  | 511 | VVLSFELLHAPA  | 522 |     |
| 87  | S1-87  | 517 | LLHAPATVCGPK  | 528 |     |
| 88  | S1-88  | 523 | TVCGPKKSTNLV  | 534 |     |
| 89  | S1-89  | 529 | KSTNLVKNKCVN  | 540 |     |
| 90  | S1-90  | 535 | KNKCVNFNFNGL  | 546 |     |
| 91  | S1-91  | 541 | FNFNGLTGTGVL  | 552 |     |
| 92  | S1-92  | 547 | TGTGVLTESNKK  | 558 |     |
| 93  | S1-93  | 553 | TESNKKFLPFQQ  | 564 |     |
| 94  | S1-94  | 559 | FLPFQQFGRDIA  | 570 |     |
| 95  | S1-95  | 565 | FGRDIADTTDAV  | 576 |     |
| 96  | S1-96  | 571 | DTTDAVRDPQTL  | 582 |     |
| 97  | S1-97  | 577 | RDPQTLLEILDIT | 588 |     |
| 98  | S1-98  | 583 | EILDITPCSFQGG | 594 |     |
| 99  | S1-99  | 589 | PCSFQGGVSVITP | 600 |     |
| 100 | S1-100 | 595 | VSVITPGTNTSN  | 606 |     |
| 101 | S1-101 | 601 | GTNTSNQVAVLY  | 612 |     |
| 102 | S1-102 | 607 | QVAVLYQDVNCT  | 618 |     |
| 103 | S1-103 | 613 | QDVNCTEVPVAI  | 624 |     |
| 104 | S1-104 | 619 | EVPVAIHADQLT  | 630 |     |
| 105 | S1-105 | 625 | HADQLTPTWRVY  | 636 |     |
| 106 | S1-106 | 631 | PTWRVYSTGSNV  | 642 |     |
| 107 | S1-107 | 637 | STGSNVFQTRAG  | 648 | N/A |
| 108 | S1-108 | 643 | FQTRAGCLIGAE  | 654 |     |
| 109 | S1-109 | 649 | CLIGAEHVNNNSY | 660 |     |
| 110 | S1-110 | 655 | HVNNSYECDIPI  | 666 |     |
| 111 | S1-111 | 661 | ECDIPIGAGICA  | 672 |     |
| 112 | S1-112 | 667 | GAGICASYQTQT  | 678 |     |
| 113 | S1-113 | 673 | SYQTQTNSPRRA  | 684 |     |
| 114 | S1-114 | 679 | NSPRRARGGGGS  | 685 |     |
| 115 | S2-1   | 686 | SVASQSIIAYTM  | 697 | N/A |
| 116 | S2-2   | 692 | IIAYTMSLGAEN  | 703 | N/A |
| 117 | S2-3   | 698 | SLGAENSVAYSN  | 709 |     |
| 118 | S2-4   | 704 | SVAYSNNSIAIP  | 715 |     |
| 119 | S2-5   | 710 | NSIAIPTNFTIS  | 721 |     |
| 120 | S2-6   | 716 | TNFTISVTTEIL  | 727 |     |
| 121 | S2-7   | 722 | VTTEILPVSMTK  | 733 |     |
| 122 | S2-8   | 728 | PVSMTKTSVDCT  | 739 |     |
| 123 | S2-9   | 734 | TSVDCTMYICGD  | 745 |     |
| 124 | S2-10  | 740 | MYICGDSTECNS  | 751 |     |
| 125 | S2-11  | 746 | STECNSLLQYQ   | 757 |     |
| 126 | S2-12  | 752 | LLLQYGSFCTQL  | 763 |     |
| 127 | S2-13  | 758 | SFCTQLNRALTG  | 769 | N/A |
| 128 | S2-14  | 764 | NRALTGIAVEQD  | 775 |     |
| 129 | S2-15  | 770 | IAVEQDKNTQEV  | 781 |     |
| 130 | S2-16  | 776 | KNTQEVFAQVKQ  | 787 |     |
| 131 | S2-17  | 782 | FAQVKQIYKTPP  | 793 |     |

|     |       |      |               |      |     |
|-----|-------|------|---------------|------|-----|
| 132 | S2-18 | 788  | IYKTPPIKDFGG  | 799  |     |
| 133 | S2-19 | 794  | IKDFGGFNFSQI  | 805  |     |
| 134 | S2-20 | 800  | FNFSQILPDPSK  | 811  |     |
| 135 | S2-21 | 806  | LPDPSKPSKRSF  | 817  |     |
| 136 | S2-22 | 812  | PSKRSFIEDLLF  | 823  |     |
| 137 | S2-23 | 818  | IEDLLFNKVTLA  | 829  |     |
| 138 | S2-24 | 824  | NKVTLADAGFIK  | 835  |     |
| 139 | S2-25 | 830  | DAGFIKQYGDCL  | 841  |     |
| 140 | S2-26 | 836  | QYGDCLGDIAAR  | 847  |     |
| 141 | S2-27 | 842  | GDIAARDLICAQ  | 853  |     |
| 142 | S2-28 | 848  | DLICAQKFNGLT  | 859  |     |
| 143 | S2-29 | 854  | KFNGLTVLPPLL  | 865  |     |
| 144 | S2-30 | 860  | VLPPLLTDEMIA  | 871  |     |
| 145 | S2-31 | 866  | TDEMIAQYTSAL  | 877  |     |
| 146 | S2-32 | 872  | QYTSALLAGTIT  | 883  |     |
| 147 | S2-33 | 878  | LAGTITSGWTFG  | 889  |     |
| 148 | S2-34 | 884  | SGWTFGAGAALQ  | 895  |     |
| 149 | S2-35 | 890  | AGAALQIPFAMQ  | 901  |     |
| 150 | S2-36 | 896  | IPFAMQMAYRFN  | 907  |     |
| 151 | S2-37 | 902  | MAYRFNGIGVTQ  | 913  |     |
| 152 | S2-38 | 908  | GIGVTQNVLYEN  | 919  |     |
| 153 | S2-39 | 914  | NVLYENQKLIAN  | 925  |     |
| 154 | S2-40 | 920  | QKLIANQFNSAI  | 931  |     |
| 155 | S2-41 | 926  | QFNSAIGKIQDS  | 937  |     |
| 156 | S2-42 | 932  | GKIQDSLSTAS   | 943  |     |
| 157 | S2-43 | 938  | LSSTASALGKLQ  | 949  |     |
| 158 | S2-44 | 944  | ALGKLQDVVNQN  | 955  |     |
| 159 | S2-45 | 950  | DVVNQNAAQALNT | 961  |     |
| 160 | S2-46 | 956  | AQALNTLVKQLS  | 967  |     |
| 161 | S2-47 | 962  | LVKQLSSNFGAI  | 973  |     |
| 162 | S2-48 | 968  | SNFGAISSVLND  | 979  |     |
| 163 | S2-49 | 974  | SSVLNDILSRLD  | 985  |     |
| 164 | S2-50 | 980  | ILSRLDKVEAEV  | 991  |     |
| 165 | S2-51 | 986  | KVEAEVQIDRLI  | 997  |     |
| 166 | S2-52 | 992  | QIDRLITGRLQS  | 1003 |     |
| 167 | S2-53 | 998  | TGRLQSLQTYVT  | 1009 |     |
| 168 | S2-54 | 1004 | LQTYVTQQLIRA  | 1015 |     |
| 169 | S2-55 | 1010 | QQLIRAAEIRAS  | 1021 |     |
| 170 | S2-56 | 1016 | AEIRASANLAAT  | 1027 |     |
| 171 | S2-57 | 1022 | ANLAATKMSECV  | 1033 |     |
| 172 | S2-58 | 1028 | KMSECVLGQSKR  | 1039 |     |
| 173 | S2-59 | 1034 | LGQSKRVDFCGK  | 1045 |     |
| 174 | S2-60 | 1040 | VDFCGKGYHLMS  | 1051 |     |
| 175 | S2-61 | 1046 | GYHLMSFPQSAP  | 1057 |     |
| 176 | S2-62 | 1052 | FPQSAPHGVVFL  | 1063 |     |
| 177 | S2-63 | 1058 | HGVVFLHVTYVP  | 1069 |     |
| 178 | S2-64 | 1064 | HVTYVPAQEKNF  | 1075 |     |
| 179 | S2-65 | 1070 | AQEKNFTTAPAI  | 1081 |     |
| 180 | S2-66 | 1076 | TTAPAICHDGKA  | 1087 |     |
| 181 | S2-67 | 1082 | CHDGKAHFPRREG | 1093 |     |
| 182 | S2-68 | 1088 | HFPREGVFSVNG  | 1099 |     |
| 183 | S2-69 | 1094 | VFVSNGTHWFVT  | 1105 |     |
| 184 | S2-70 | 1100 | THWFVTQRNFYE  | 1111 |     |
| 185 | S2-71 | 1106 | QRNFYEPQIITT  | 1117 |     |
| 186 | S2-72 | 1112 | PQIITTDNTFVS  | 1123 |     |
| 187 | S2-73 | 1118 | DNTFVSGNCDVV  | 1129 |     |
| 188 | S2-74 | 1124 | GNCDVVIGIVNN  | 1135 | N/A |
| 189 | S2-75 | 1130 | IGIVNNTVYDPL  | 1141 |     |
| 190 | S2-76 | 1136 | TVYDPLQPELDS  | 1147 |     |
| 191 | S2-77 | 1142 | QPELDSFKEELD  | 1153 |     |
| 192 | S2-78 | 1148 | FKEELDKYFKNH  | 1159 |     |
| 193 | S2-79 | 1154 | KYFKNHTSPDVD  | 1165 |     |
| 194 | S2-80 | 1160 | TSPDVDLGDISG  | 1171 |     |
| 195 | S2-81 | 1166 | LGDISGINASVV  | 1177 |     |
| 196 | S2-82 | 1172 | INASVVNIQKEI  | 1183 |     |
| 197 | S2-83 | 1178 | NIQKEIDRLNEV  | 1189 |     |
| 198 | S2-84 | 1184 | DRLNEVAKNLNE  | 1195 |     |

---

|     |       |      |              |      |     |
|-----|-------|------|--------------|------|-----|
| 199 | S2-85 | 1190 | AKNLNESLIDLQ | 1201 |     |
| 200 | S2-86 | 1196 | SLIDLQELGKYE | 1207 |     |
| 201 | S2-87 | 1202 | ELGKYEQYIKWP | 1213 |     |
| 202 | S2-88 | 1208 | QYIKWPWYIWLG | 1219 |     |
| 203 | S2-89 | 1214 | WYIWLGFIAGLI | 1225 | N/A |
| 204 | S2-90 | 1220 | FIAGLIAIVMVT | 1231 | N/A |
| 205 | S2-91 | 1226 | AIVMVTIMLCCM | 1237 | N/A |
| 206 | S2-92 | 1232 | IMLCCMTSCCSC | 1243 | N/A |
| 207 | S2-93 | 1238 | TSCCCLKGCCS  | 1249 |     |
| 208 | S2-94 | 1244 | LKGCCSCGSCCK | 1255 | N/A |
| 209 | S2-95 | 1250 | CGSCCKFDEDDS | 1261 |     |
| 210 | S2-96 | 1256 | FDEDDSEPVKLG | 1267 |     |
| 211 | S2-97 | 1262 | EPVLKGVKLHYT | 1273 |     |

---
